# Supplementary material for: A complete Leishmania donovani reference genome identifies novel genetic variations associated with virulence
Source: PubMed Central journal article supplement (PMC6224596; doi:10.1038/s41598-018-34812-x), 2018-11-08
Supplement: 41598_2018_34812_MOESM1_ESM.pdf [file 41598_2018_34812_MOESM1_ESM.pdf]

A complete *Leishmania donovani* reference genome identifies novel genetic variations associated with virulence.

Patrick Lypaczewski<sup>1</sup>, Johanna Hoshizaki<sup>1</sup>, Wen-Wei Zhang<sup>1</sup>, Laura-Isobel McCall<sup>1,2</sup>, John Torcivia-Rodriguez<sup>3</sup>, Vahan Simonyan<sup>3</sup>, Amanpreet Kaur<sup>4,5</sup>, Ken Dewar<sup>4,5</sup>, Greg Matlashewski<sup>1\*</sup>

**Supplementary Table S1.** List of *L. donovani* pseudogenes derived from *L. major*

| Chromosome | Start   | Stop    | Strand | Gene ID         | Internal Stop | Frameshift | L. Major origin |
|------------|---------|---------|--------|-----------------|---------------|------------|-----------------|
| LdCL_06    | 518294  | 520041  | +      | LdCL_060018900  |               | XXXX       | LmjF.22.0010    |
| LdCL_08    | 550785  | 551865  | +      | LdCL_080018700  |               | XXXXXX     | LmjF.08.1265    |
| LdCL_10    | 79199   | 79729   | +      | LdCL_100006900  | XX            | XX         | LmjF.10.0185    |
| LdCL_12    | 603220  | 604085  | +      | LdCL_120018300  |               | XXXXXX     | LmjF.12.0880    |
| LdCL_16    | 316885  | 317791  | -      | LdCL_160014100  | XXXX          | XXXX       | LmjF.16.0880    |
| LdCL_26    | 580729  | 582519  | +      | LdCL_260021400  | XXXX          | XXX        | LmjF.26.1590    |
| LdCL_27    | 527810  | 529301  | -      | LdCL_270017800  | XXXX          | XXXXXX     | LmjF.14.0180    |
| LdCL_27    | 732393  | 732680  | -      | LdCL_270023400* | X             |            | LmjF.27.1740    |
| LdCL_31    | 1179486 | 1180414 | -      | LdCL_310031700  | XXXXXX        | XXX        | LmjF.31.2310    |
| LdCL_31    | 1334630 | 1335706 | -      | LdCL_310035400  | XXX           | XX         | LmjF.29.1570    |
| LdCL_32    | 784327  | 785612  | -      | LdCL_320026000  | XX            | X          | LmjF.32.1950    |
| LdCL_33    | 702441  | 703568  | +      | LdCL_330023800  | XXXXXX        | XXXXXX     | LmjF.32.2640    |
| LdCL_35    | 1479577 | 1480153 | -      | LdCL_350044600  | XX            | XX         | LmjF.35.3910    |

13 pseudogene annotations in *L. donovani* originated from 13 intact functional genes from *L. major* in the current assembly. The 13 pseudogenes were common across all 3 isolates sequences in this study. The locations of the pseudogenes are given in chromosomal position from start to stop. Strand indicates direction of transcription. Each stop codon and frameshift are marked with an X. *L. major* origin denotes the equivalent functional gene ID in *L. major*.

\*One gene contains only one stop codon; this gene however is also missing a start codon.

**Supplementary Figure S1.** Coverage graphs of the new *L. donovani* assembly

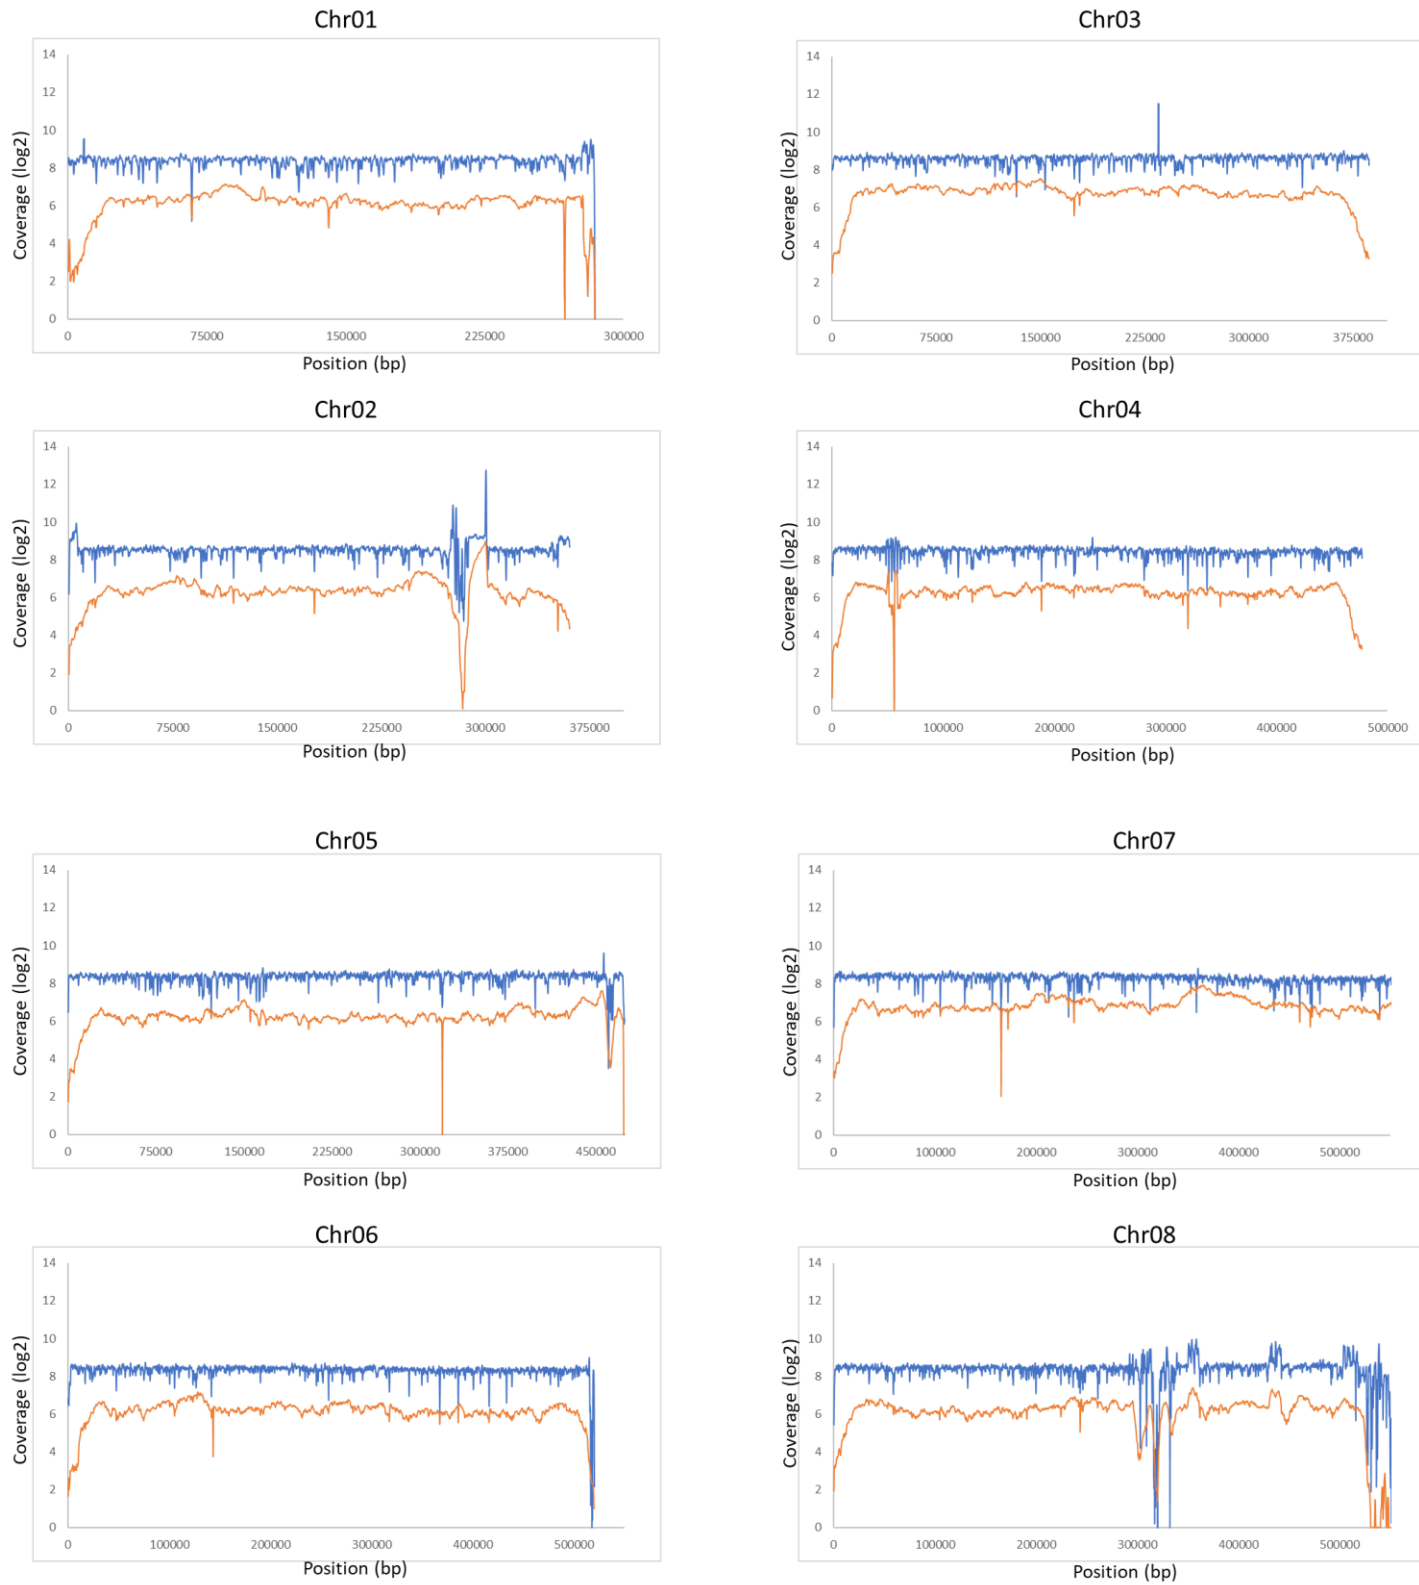

Chr09

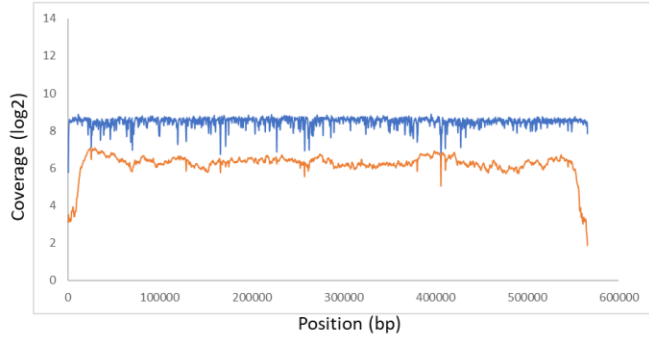

Chr11

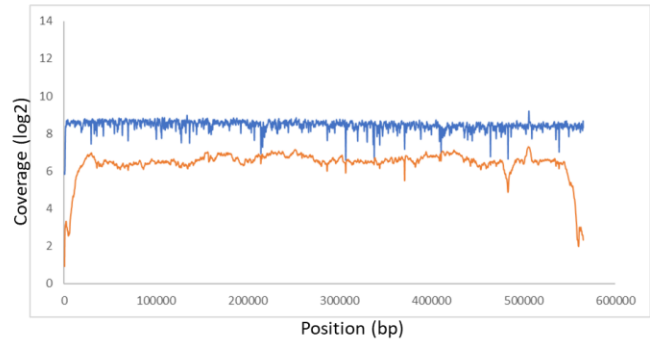

Chr10

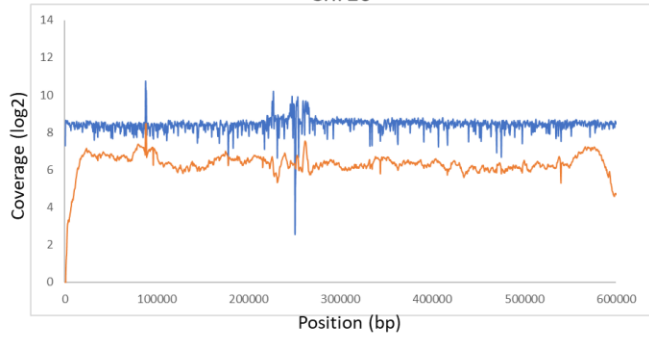

Chr12

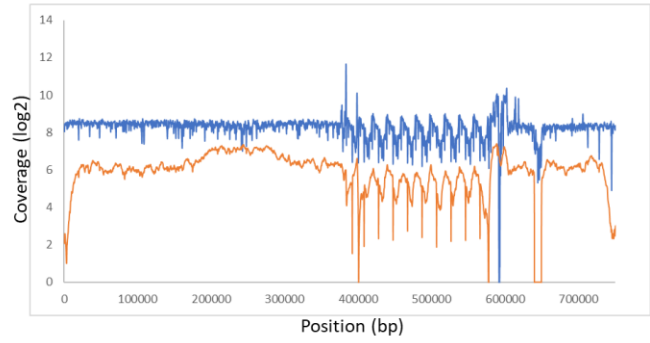

Chr13

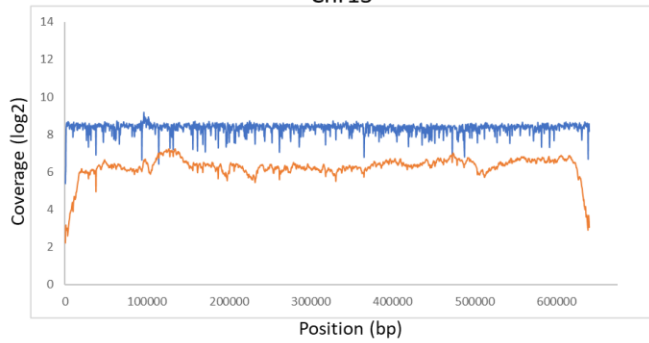

Chr15

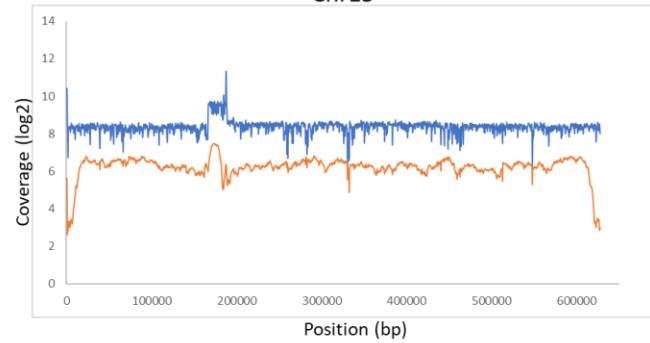

Chr14

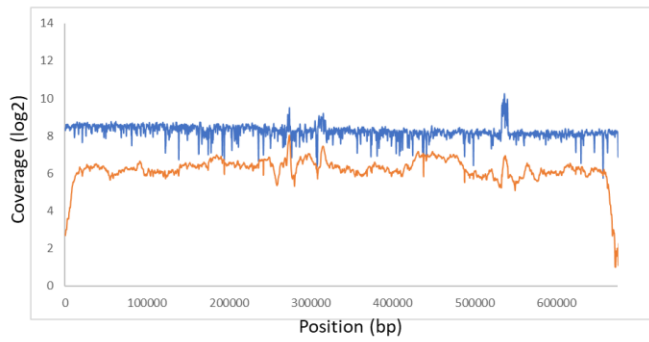

Chr16

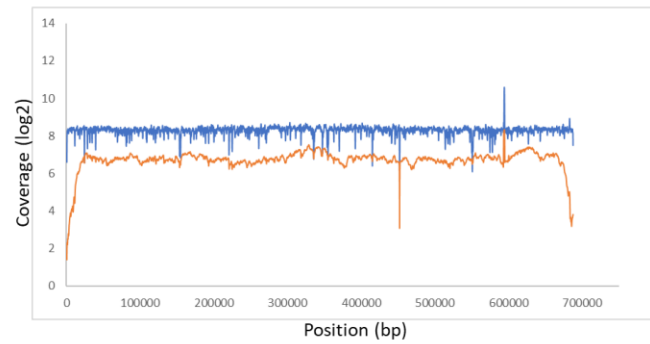

Chr17

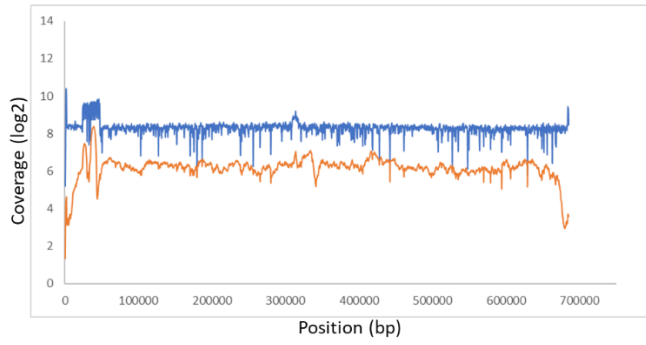

Chr19

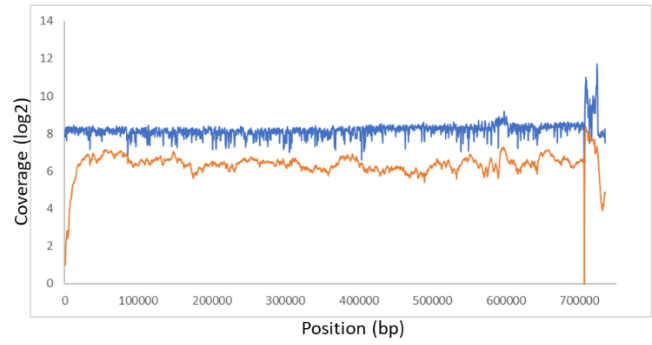

Chr18

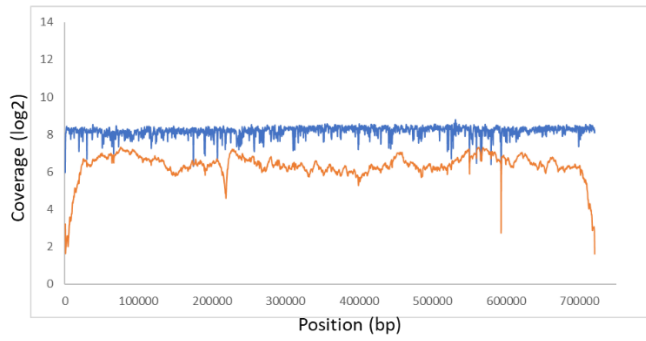

Chr20

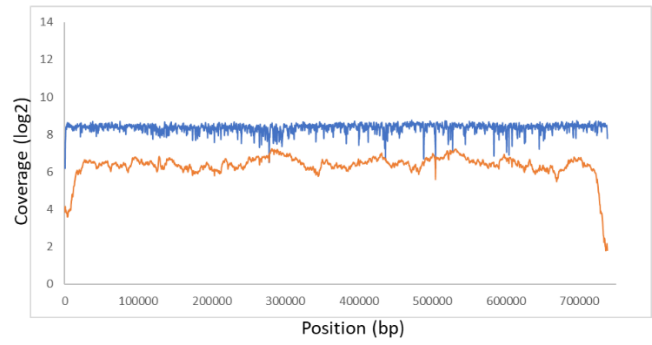

Chr21

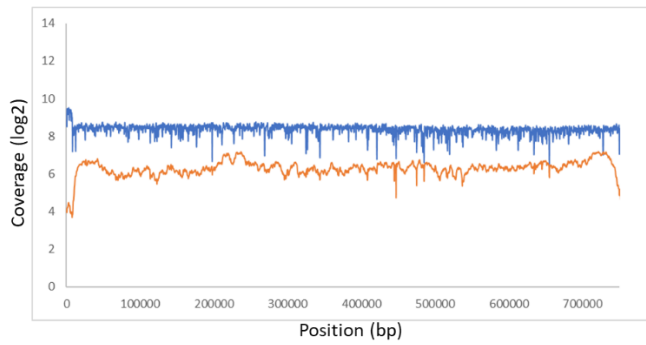

Chr23

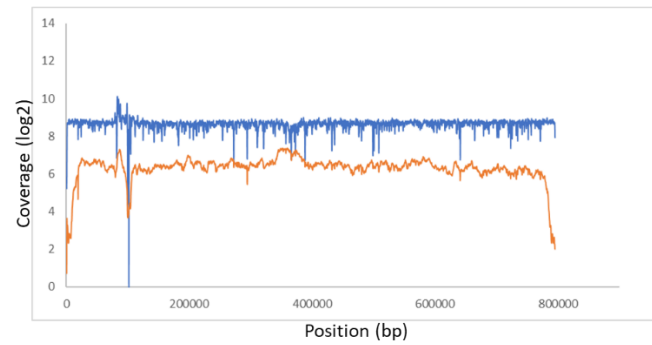

Chr22

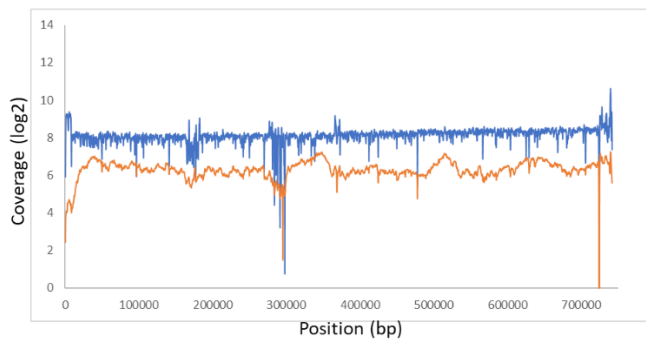

Chr24

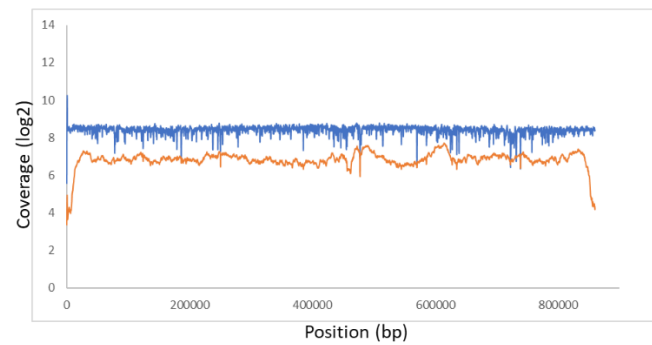

Chr25

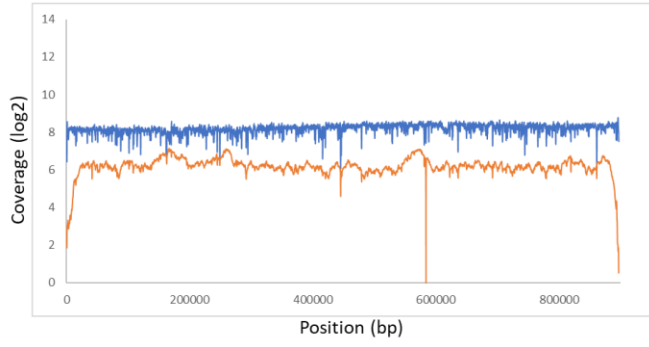

Chr27

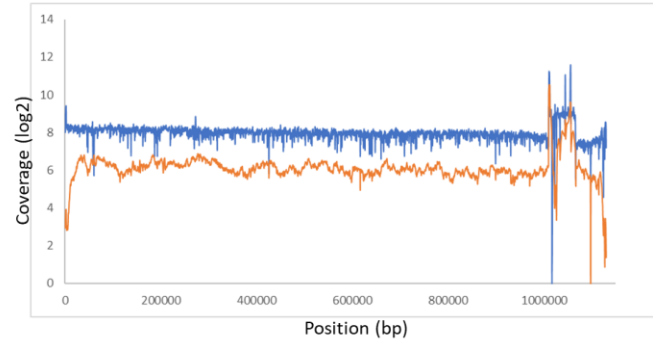

Chr26

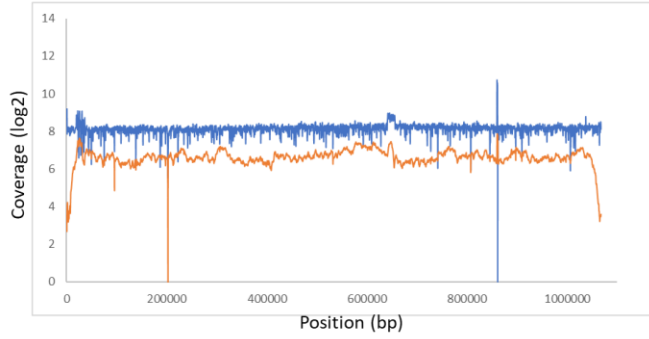

Chr28

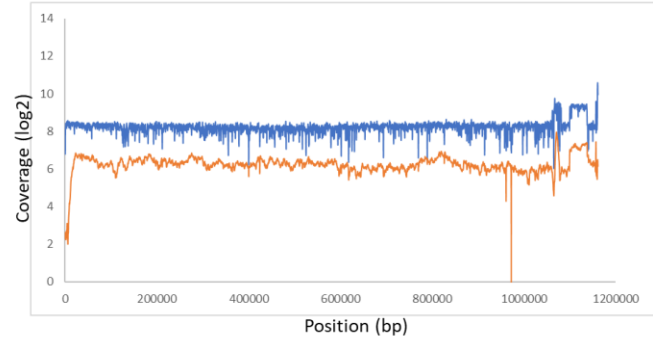

Chr29

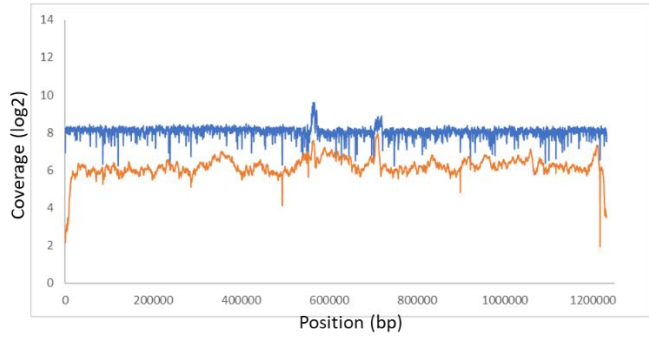

Chr31

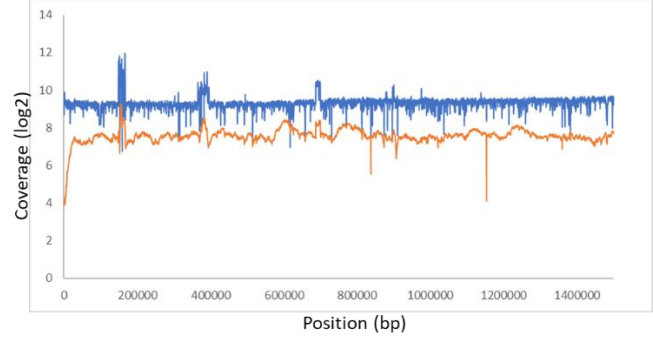

Chr30

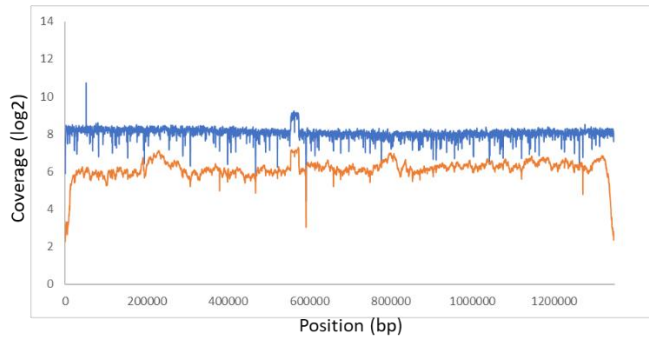

Chr32

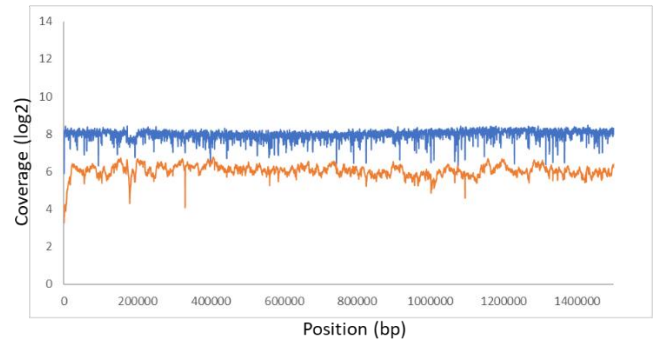

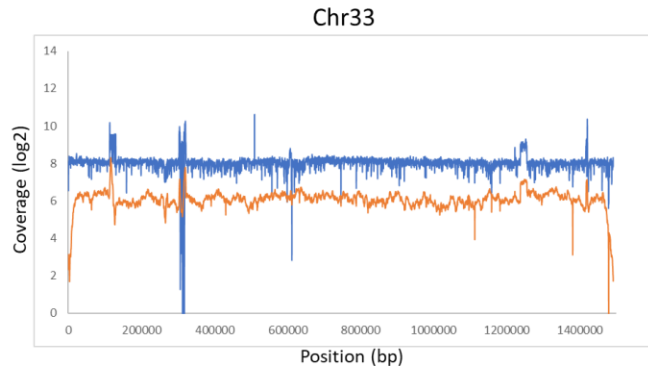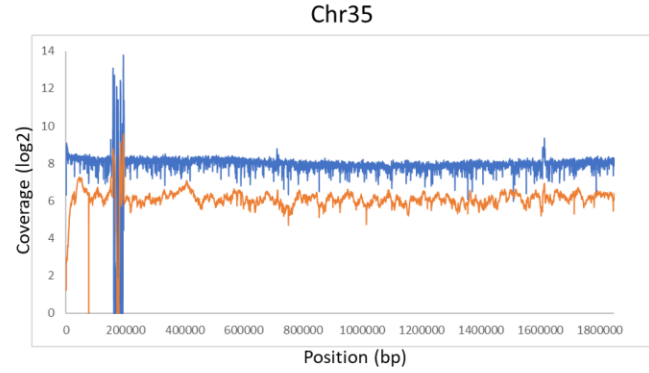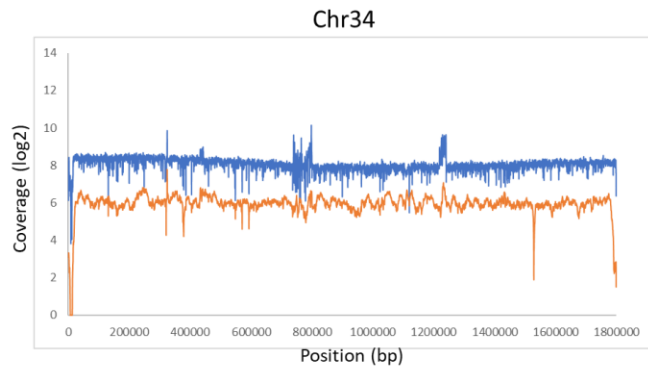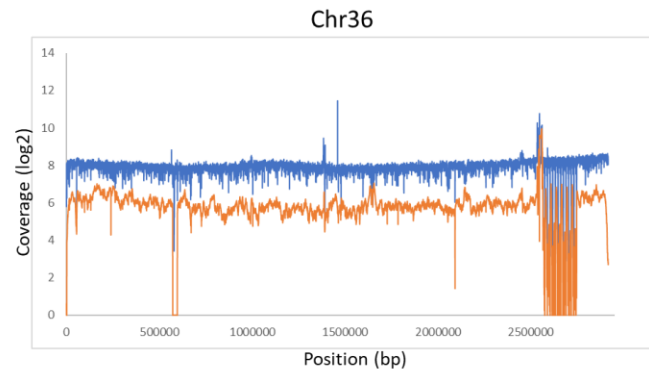

Read coverage of each chromosome in the new assembly. Graphs were generated from the moving average of the raw coverage at each position with a window size of 450bp, equivalent to the average Illumina read insert size. Illumina data plotted in blue, PacBio data plotted in orange.





**Supplementary Figure S3.** Synteny map of the *L. major* and *L. donovani* chromosomes.

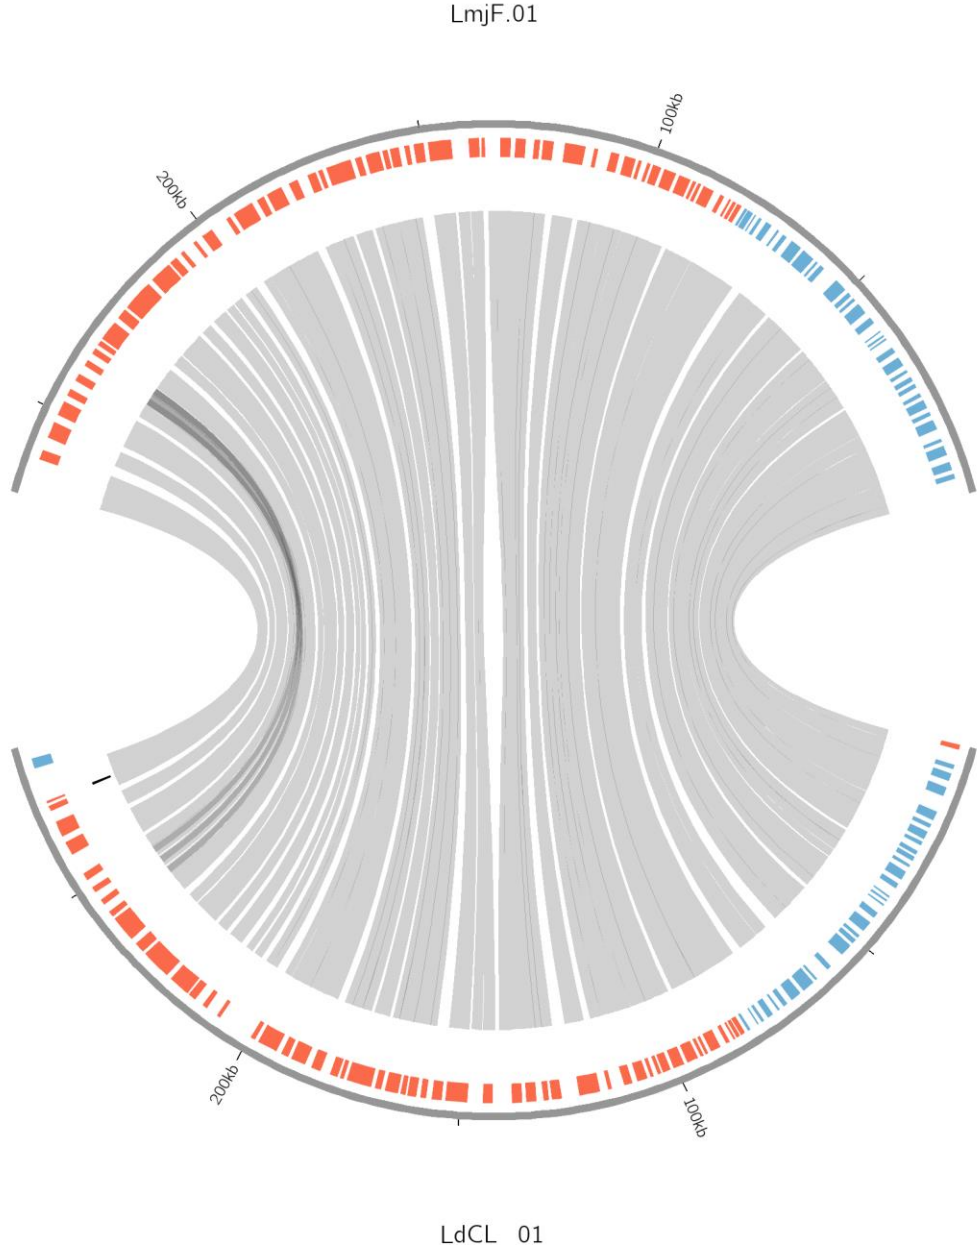

LmjF.02

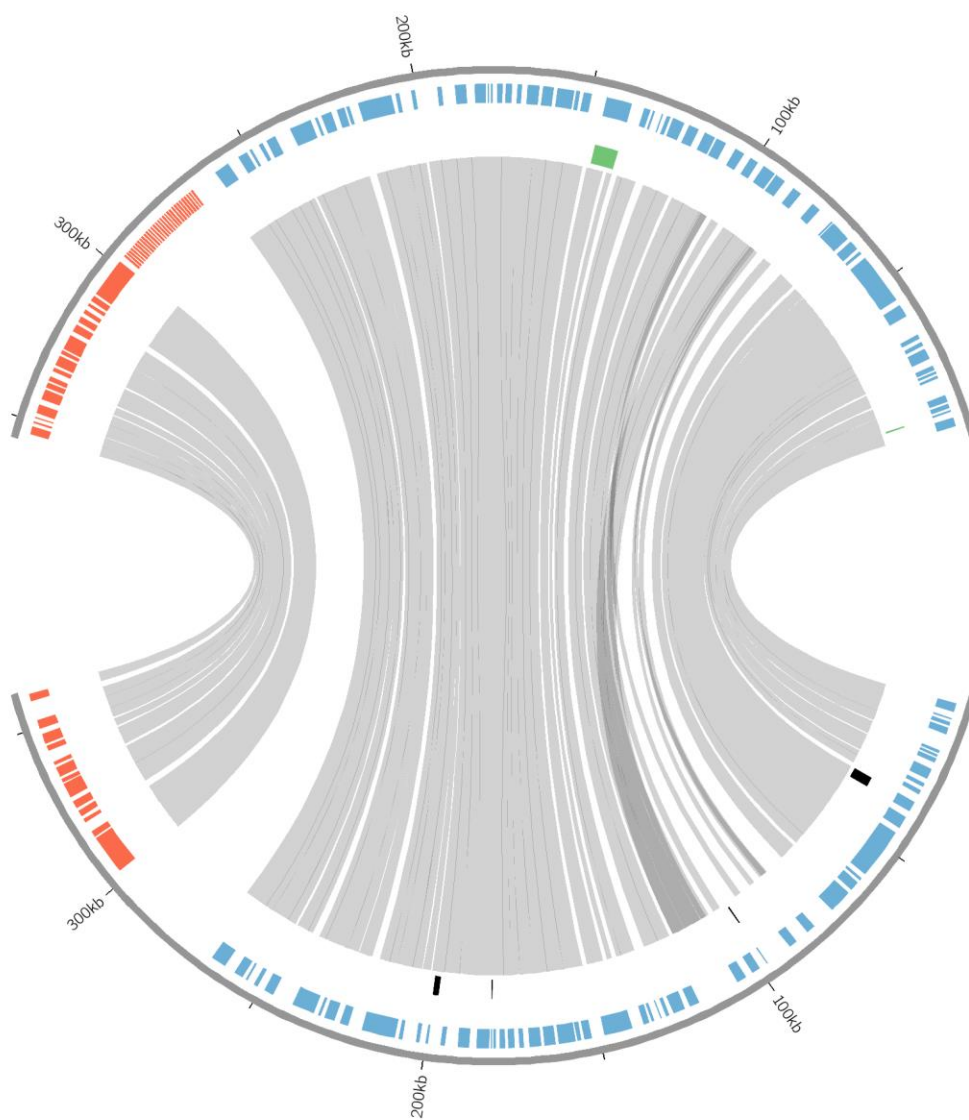

LdCL\_02

LmjF.03

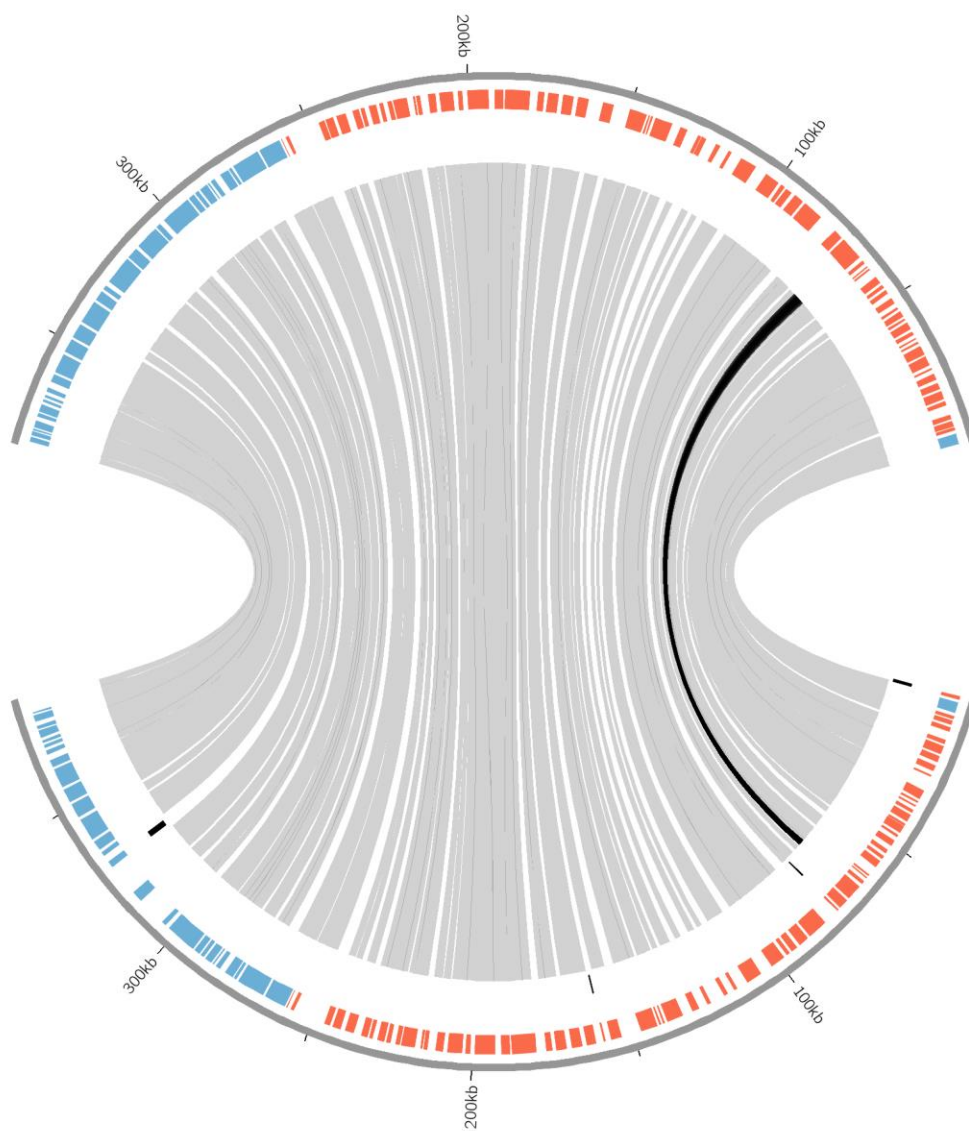

LdCL 03

LmjF.04

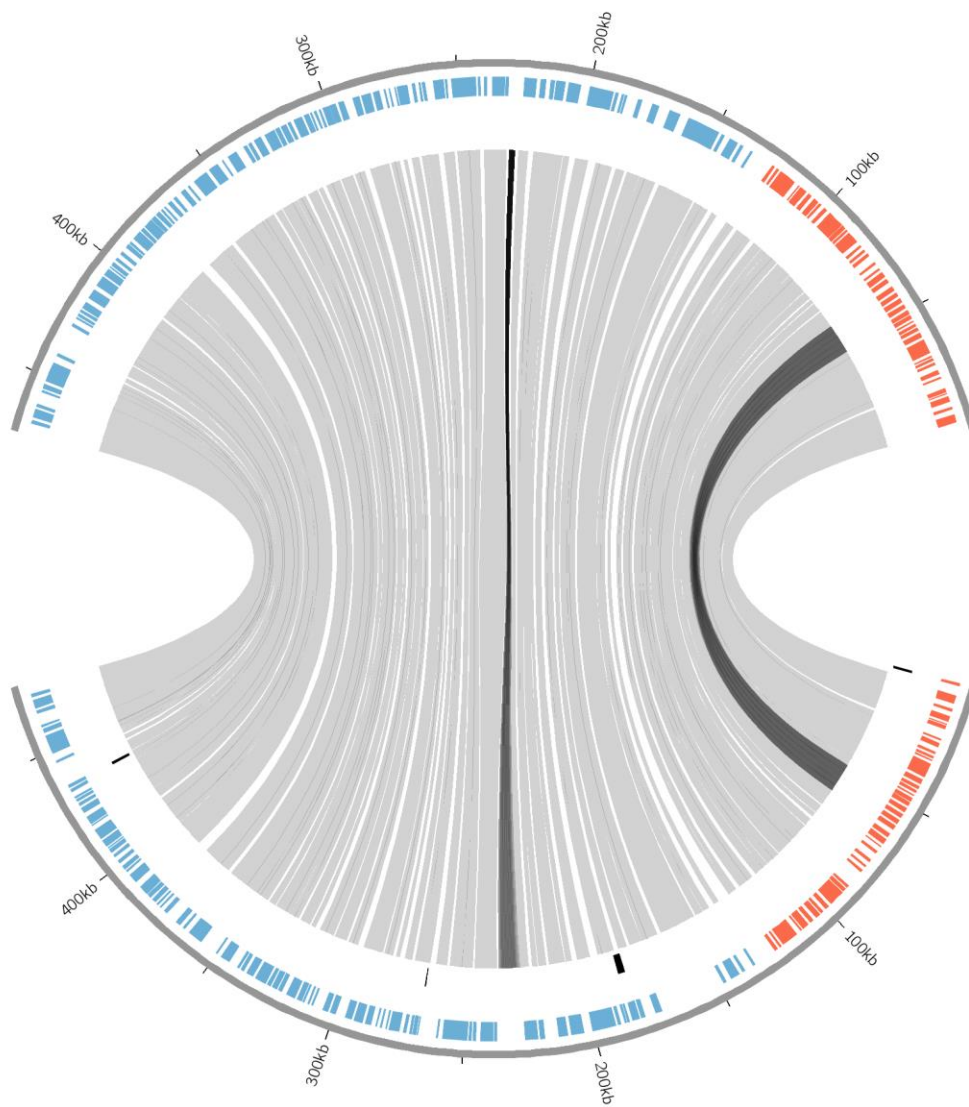

LdCL 04

LmjF.05

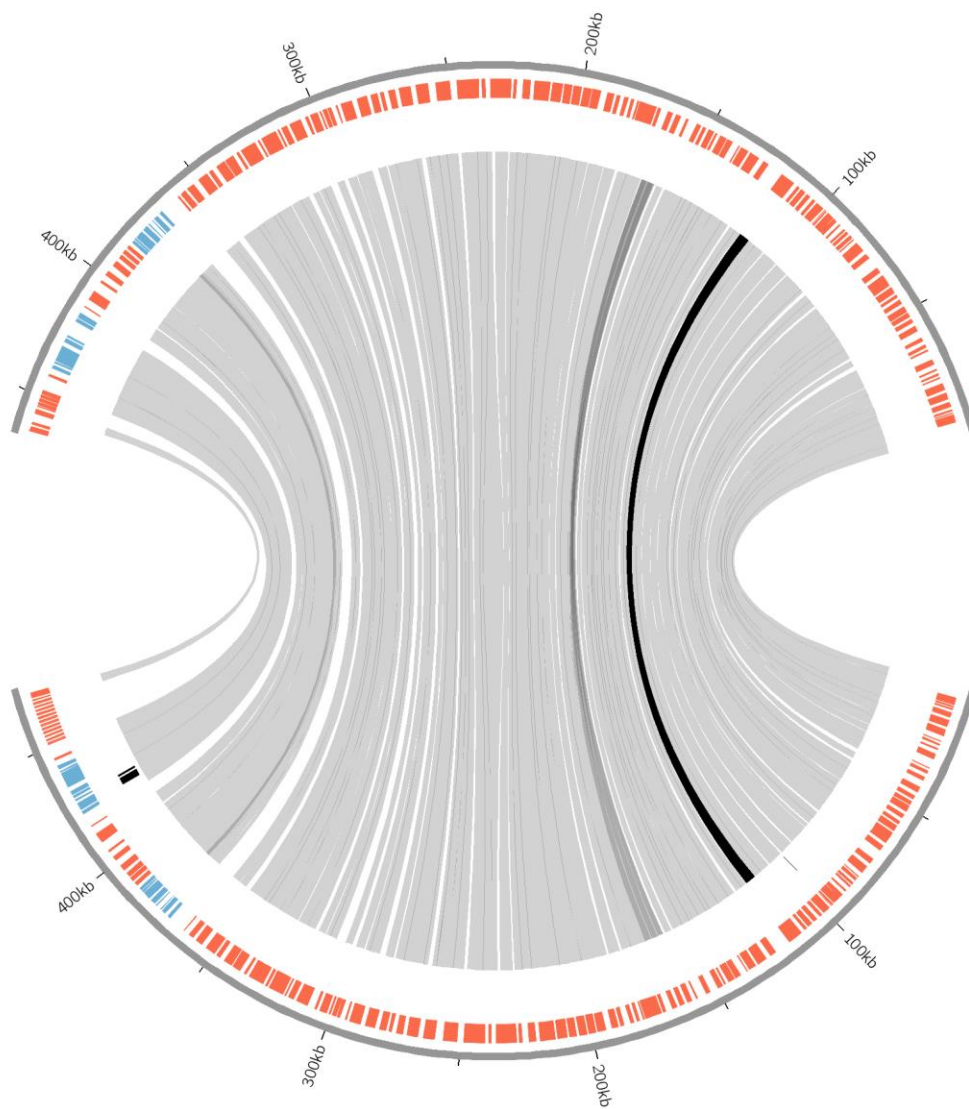

LdCL 05

LmjF.06

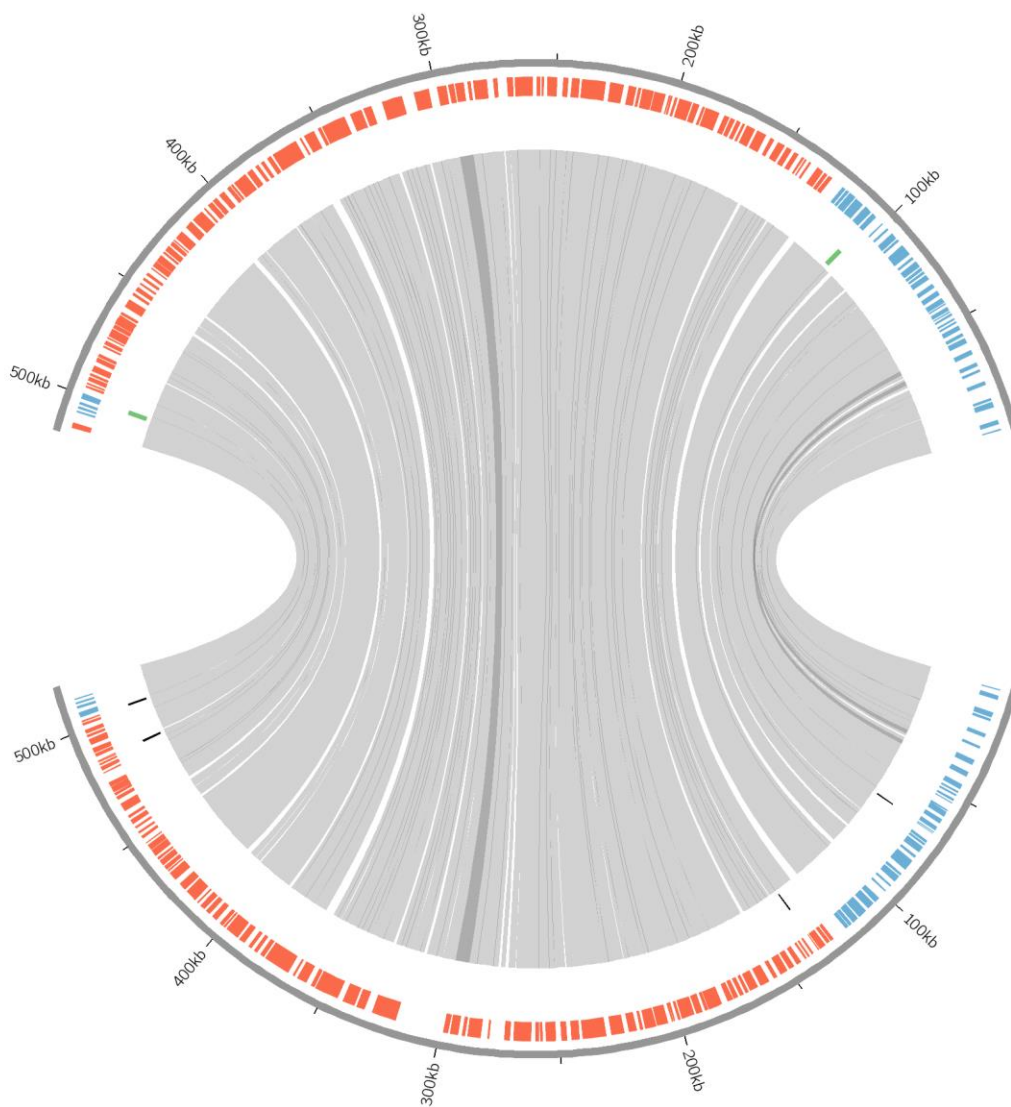

LdCL 06

LmjF.07

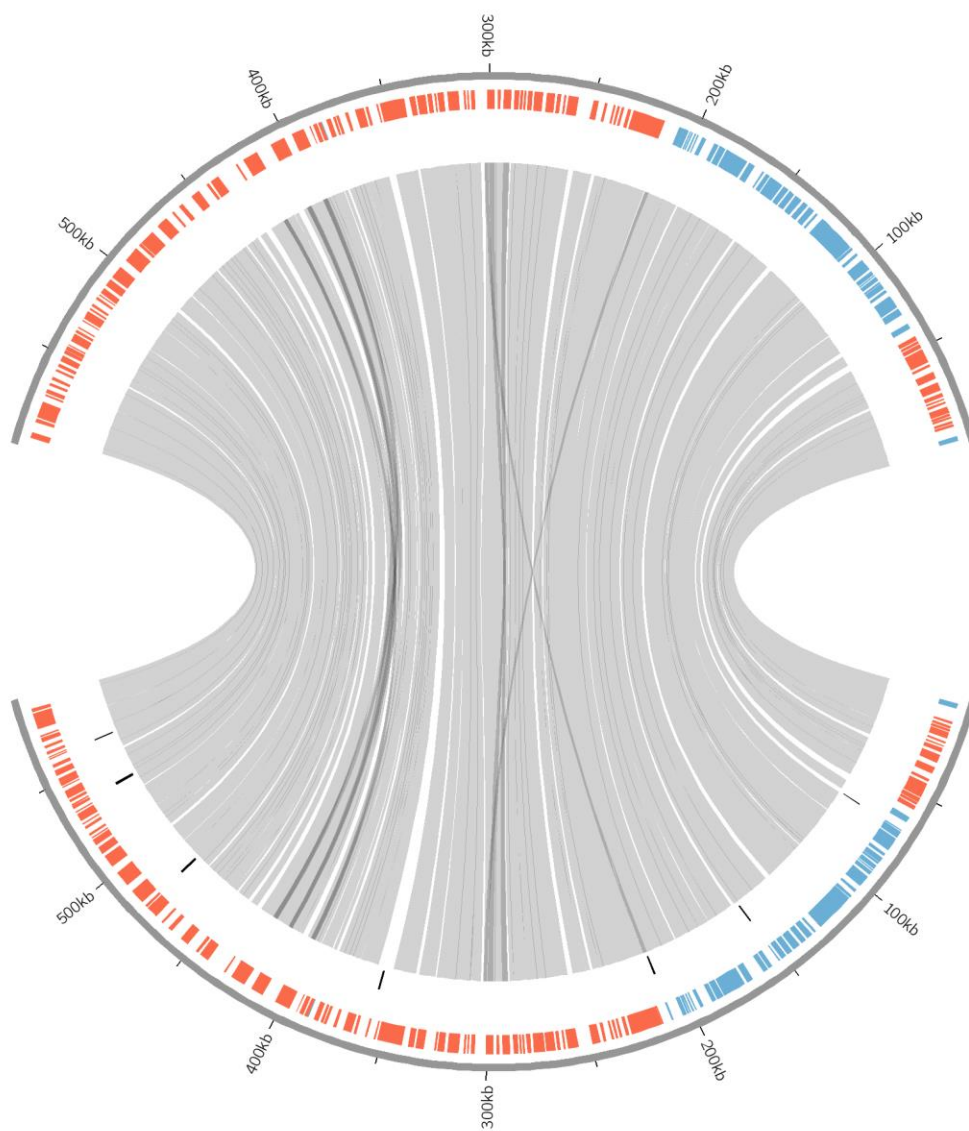

LdCL 07

LmjF.08

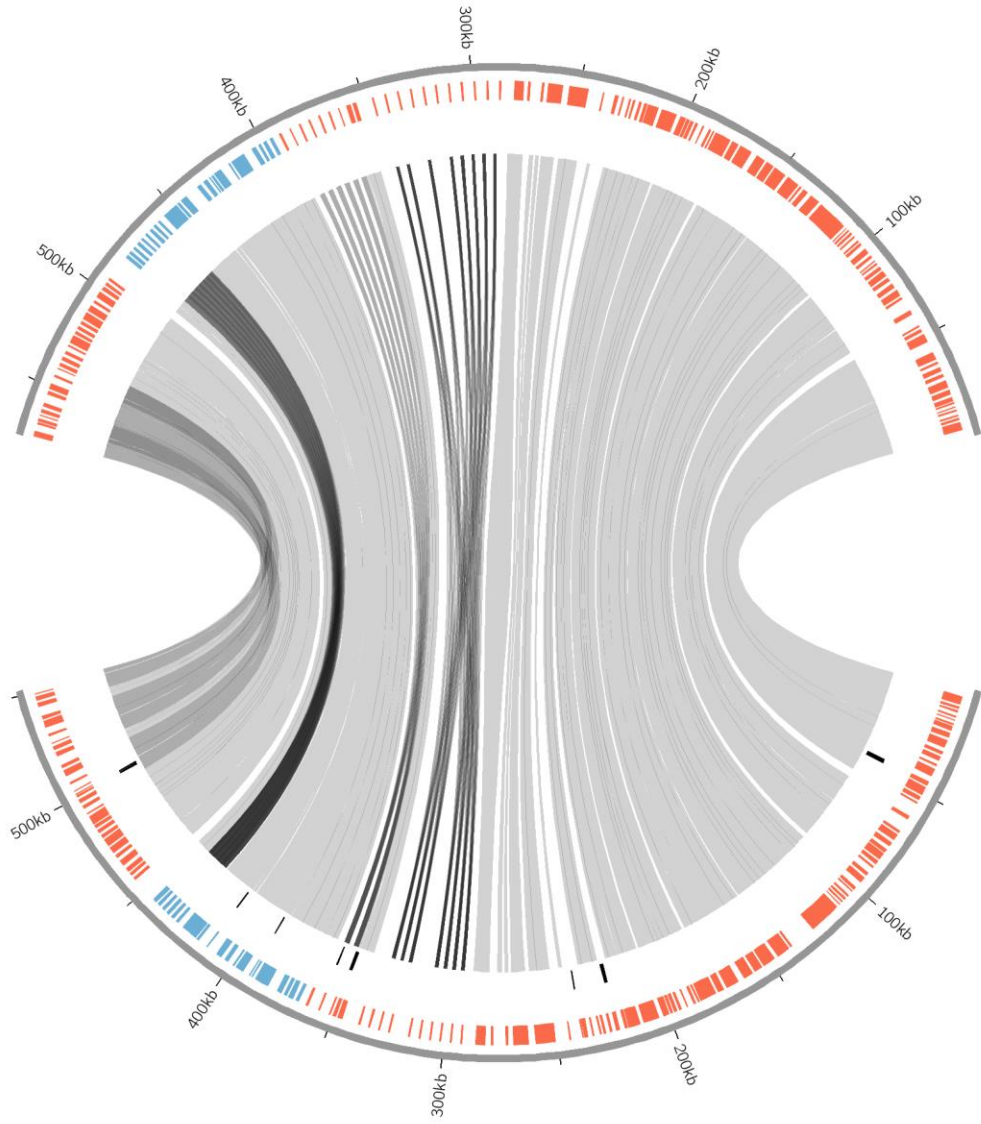

LdCL 08



LmjF.09

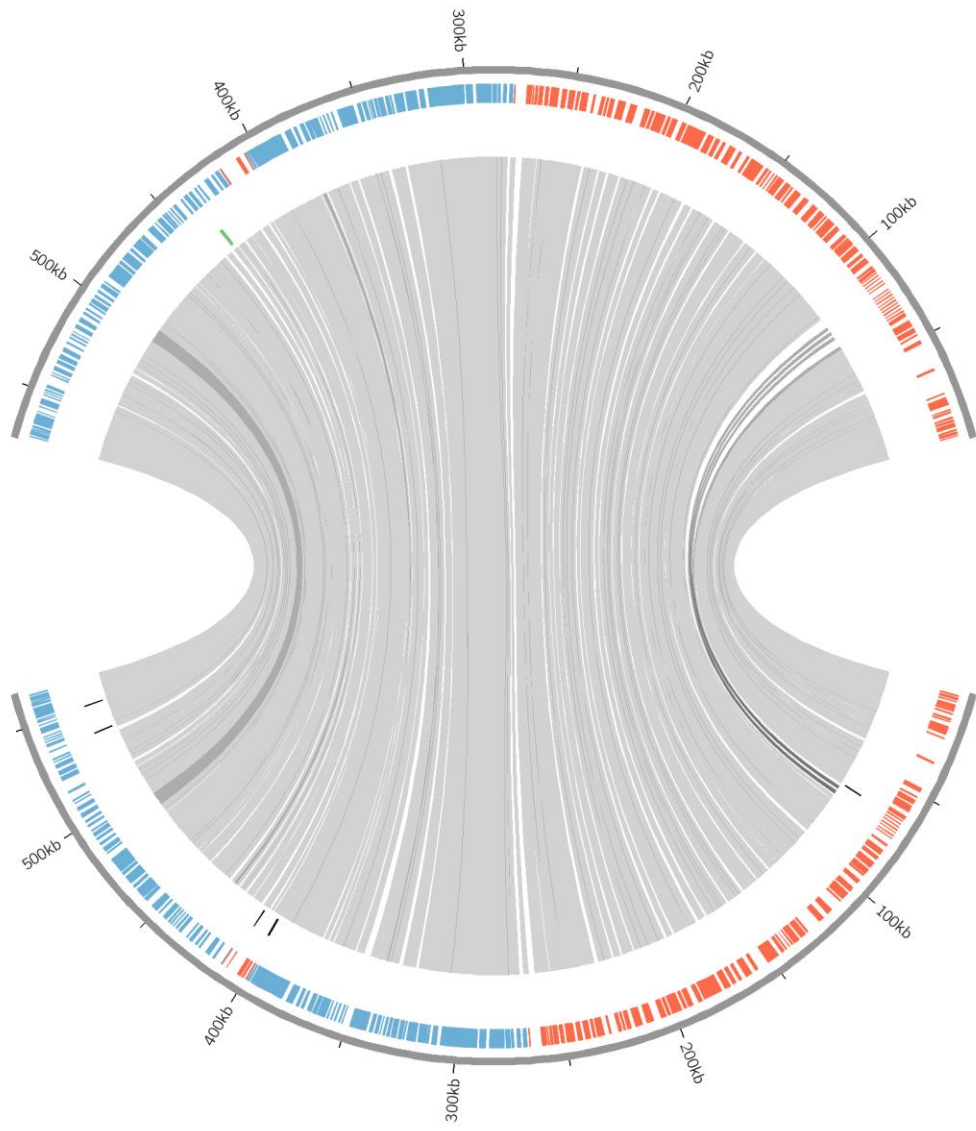

LdCL 09

LmjF.10

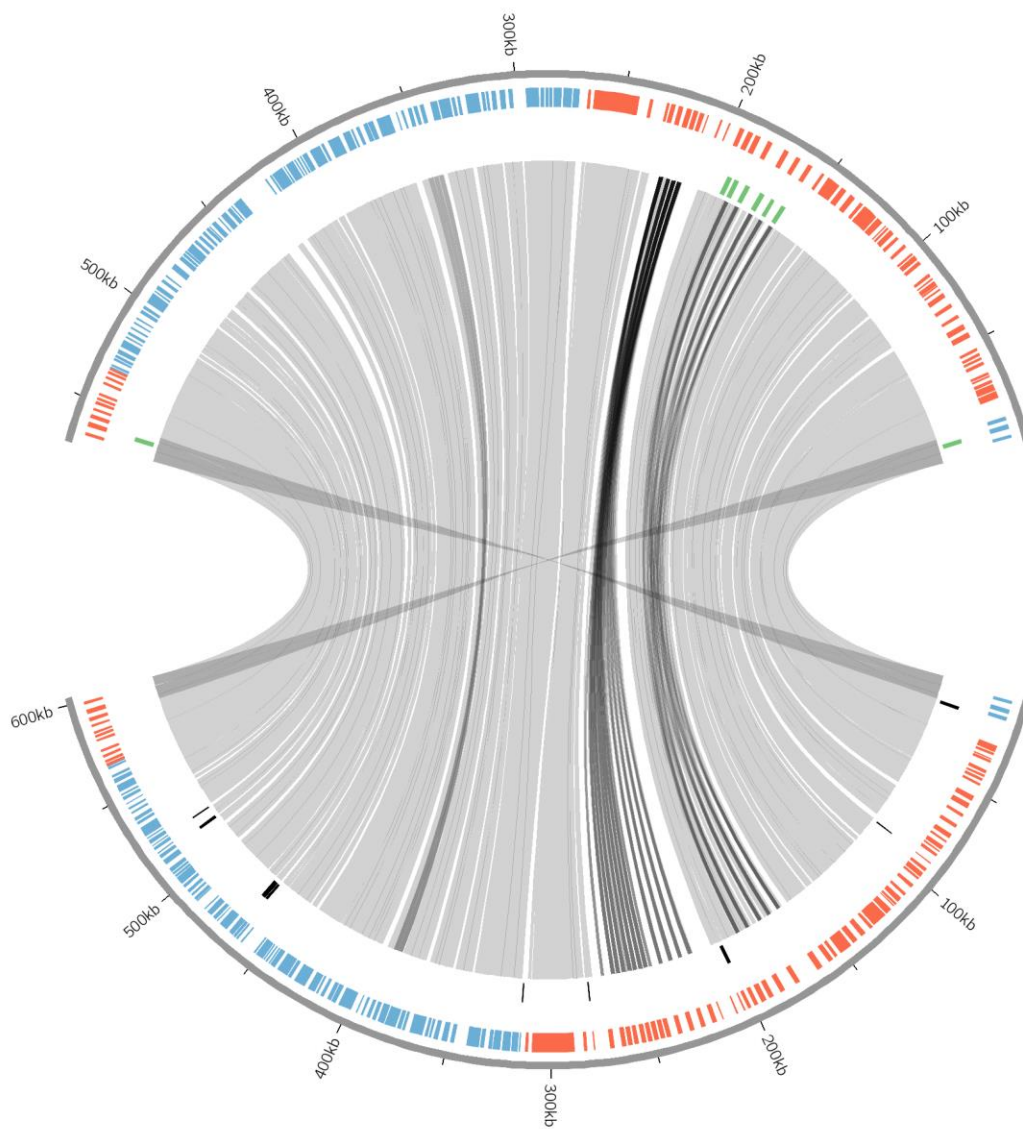

LdCL 10

LmjF.11

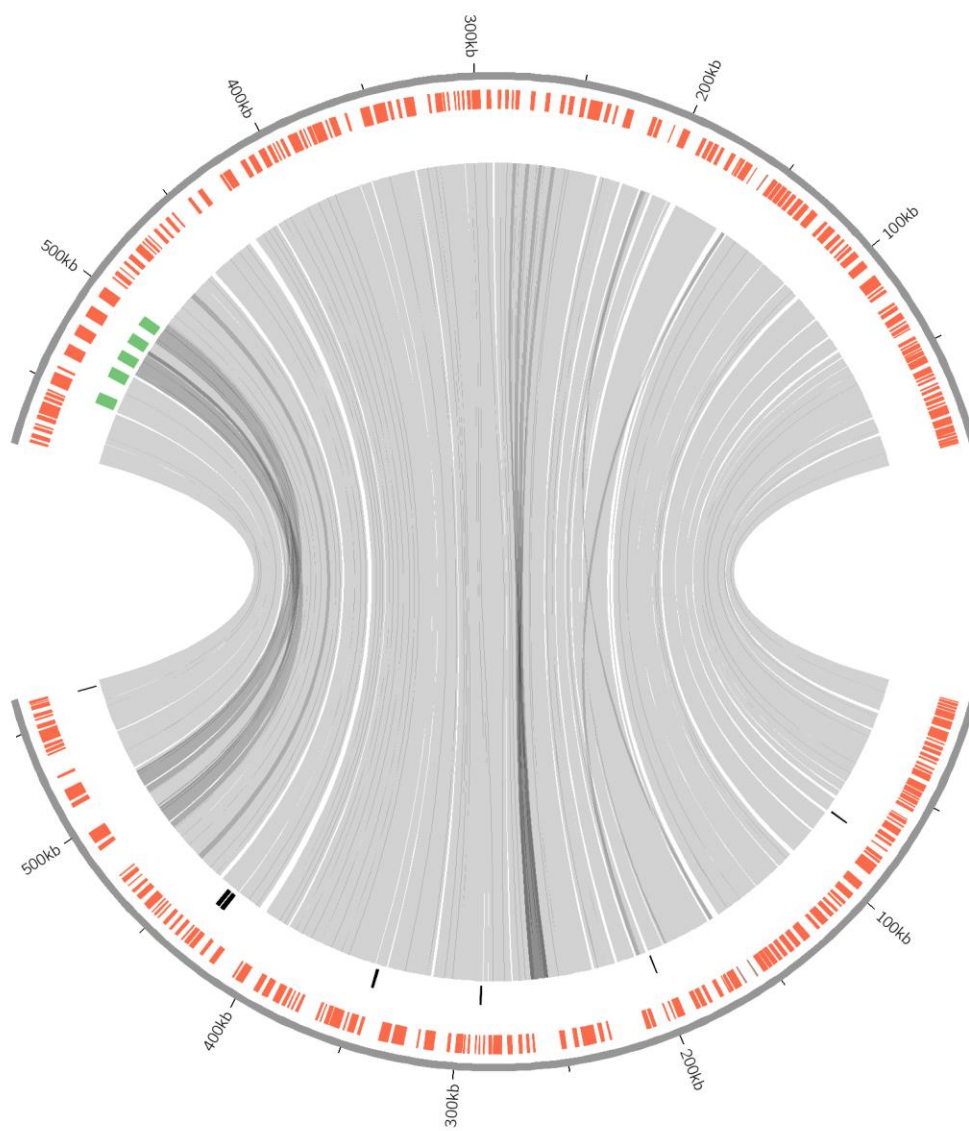

LdCL 11

LmjF.12

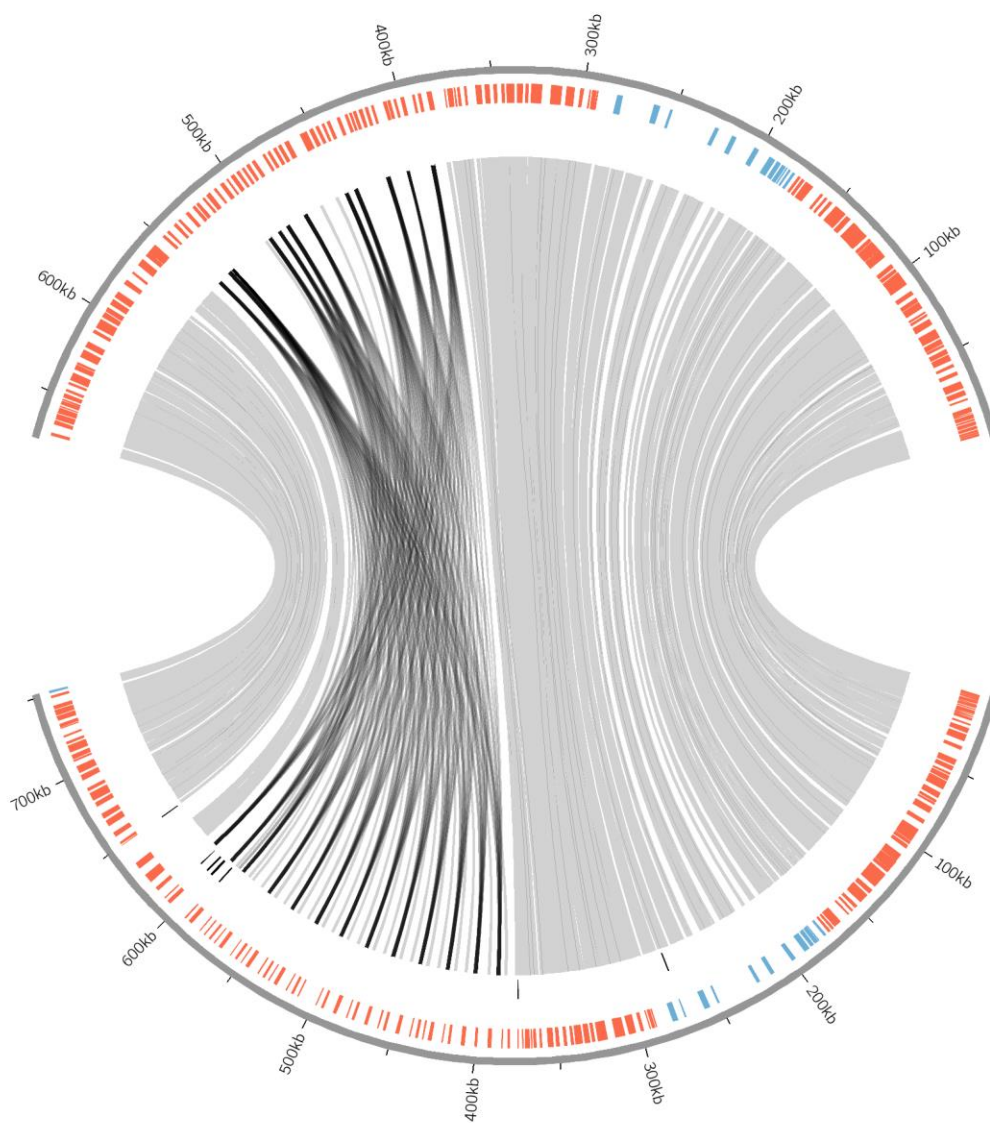

LdCL 12

LmjF.13

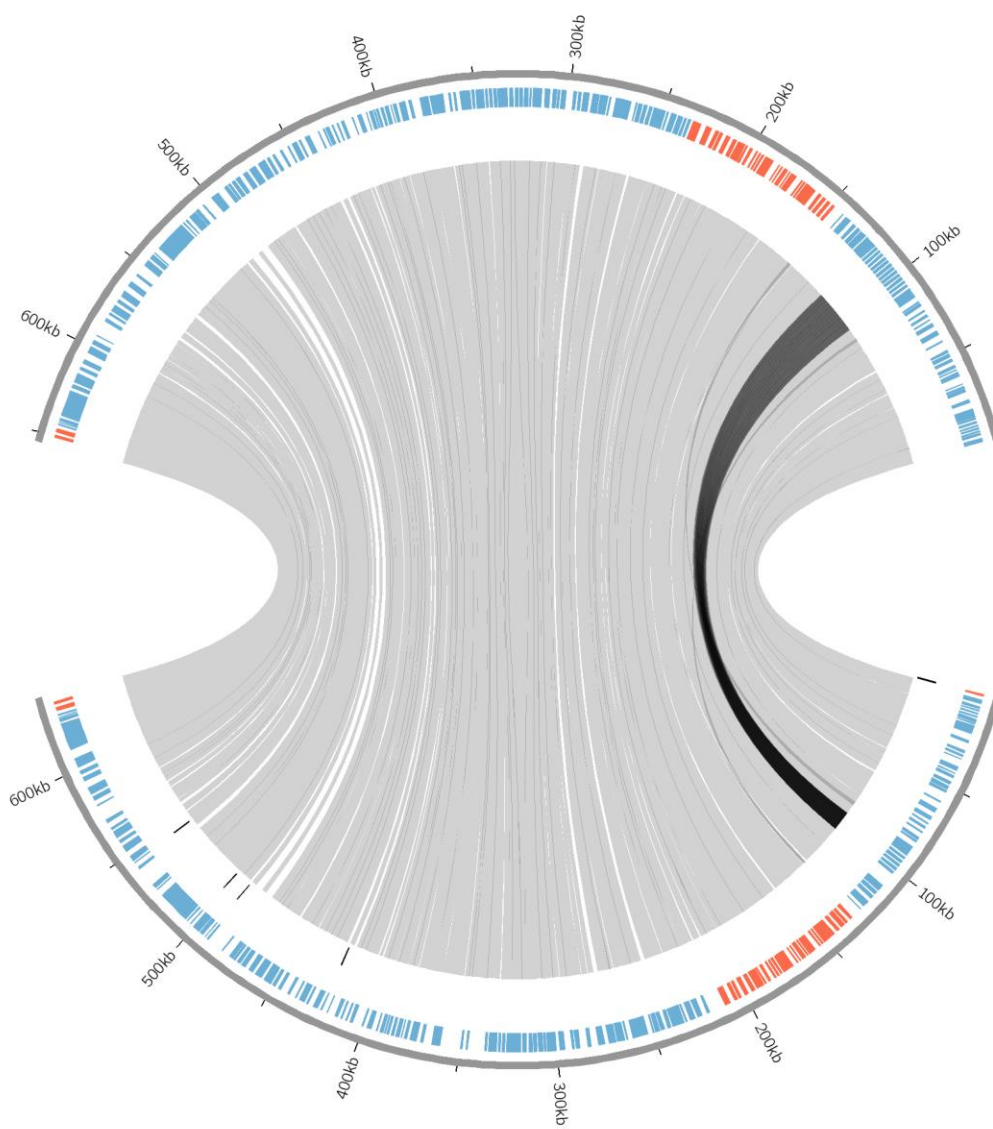

LdCL 13

LmjF.14

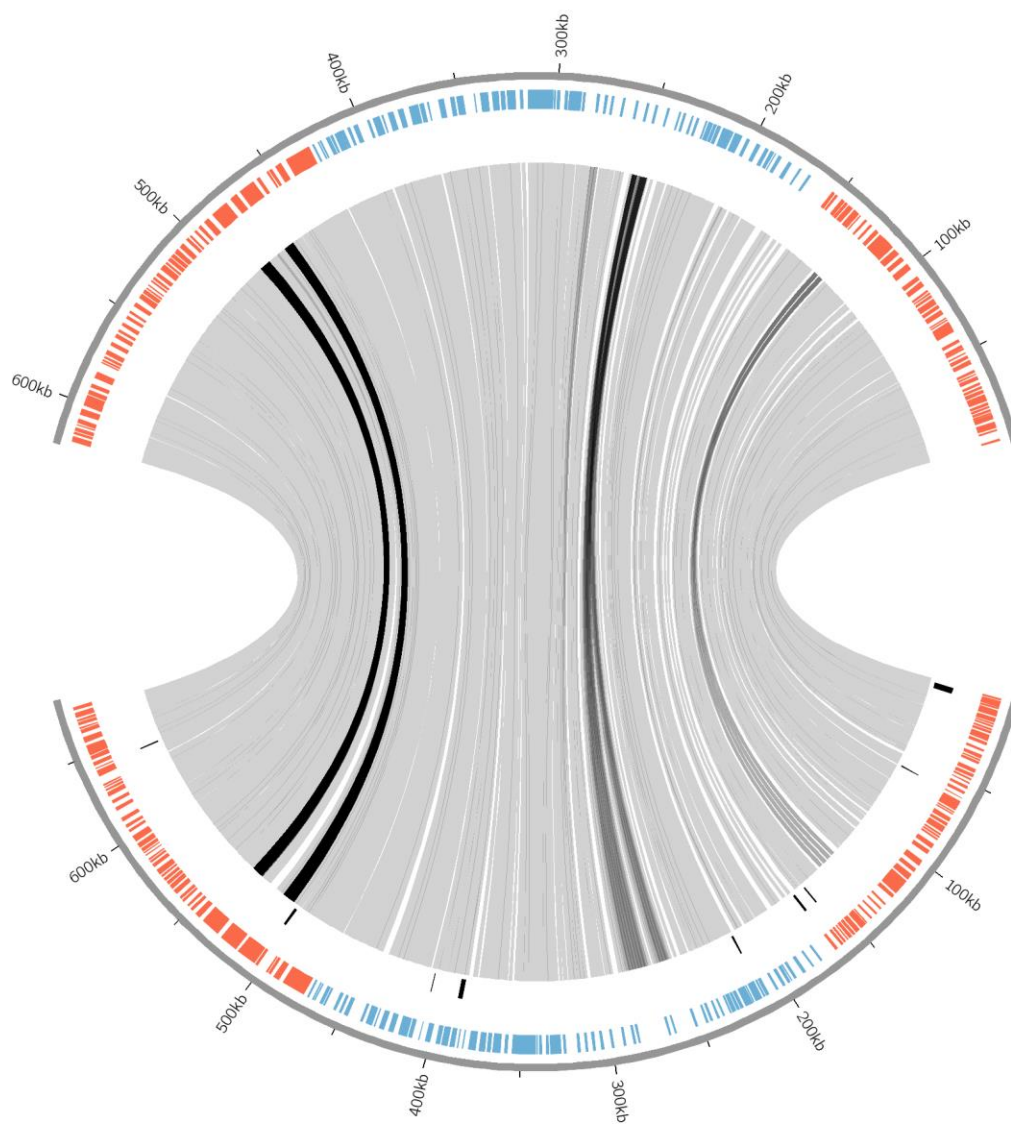

LdCL 14

LmjF.15

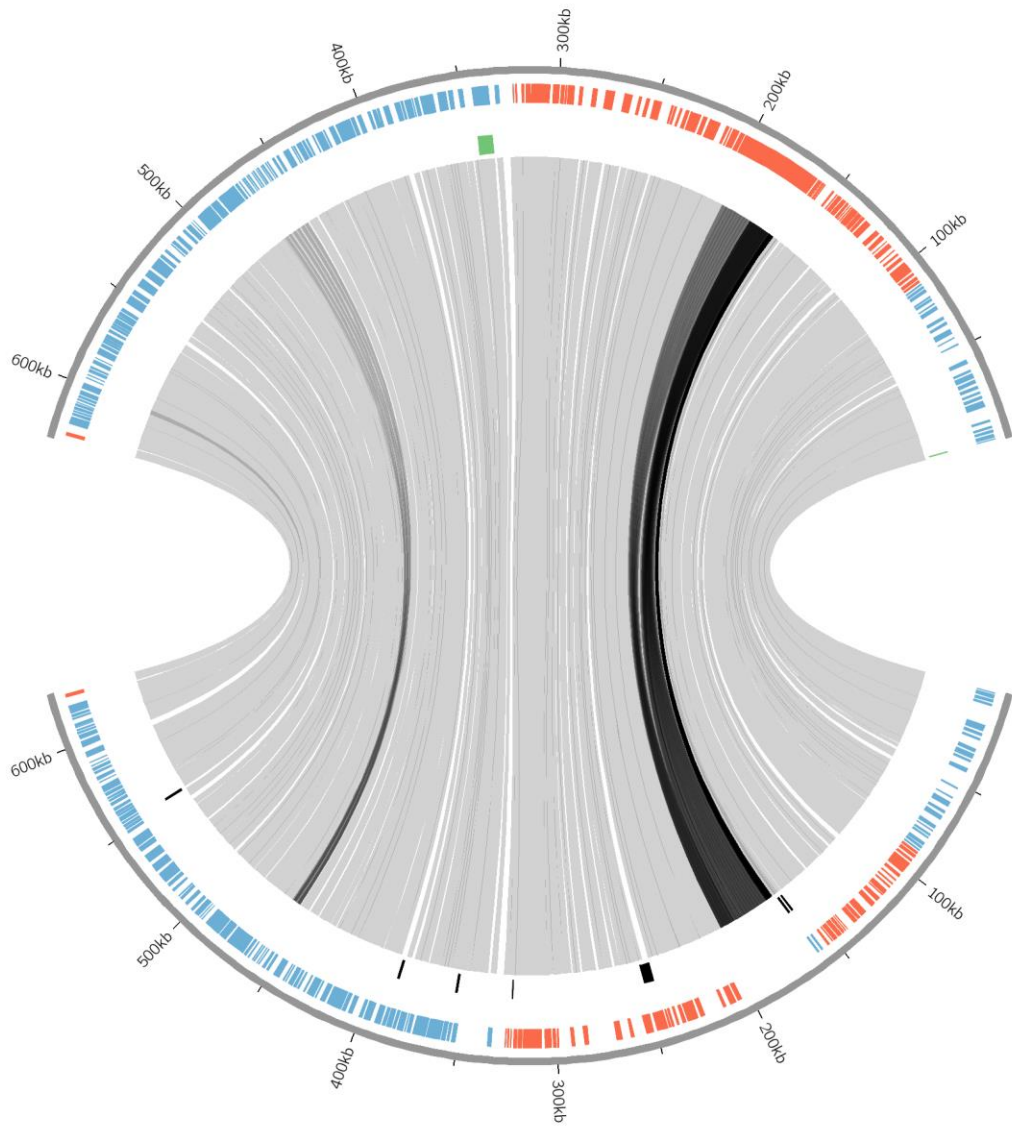

LdCL 15

LmjF.16

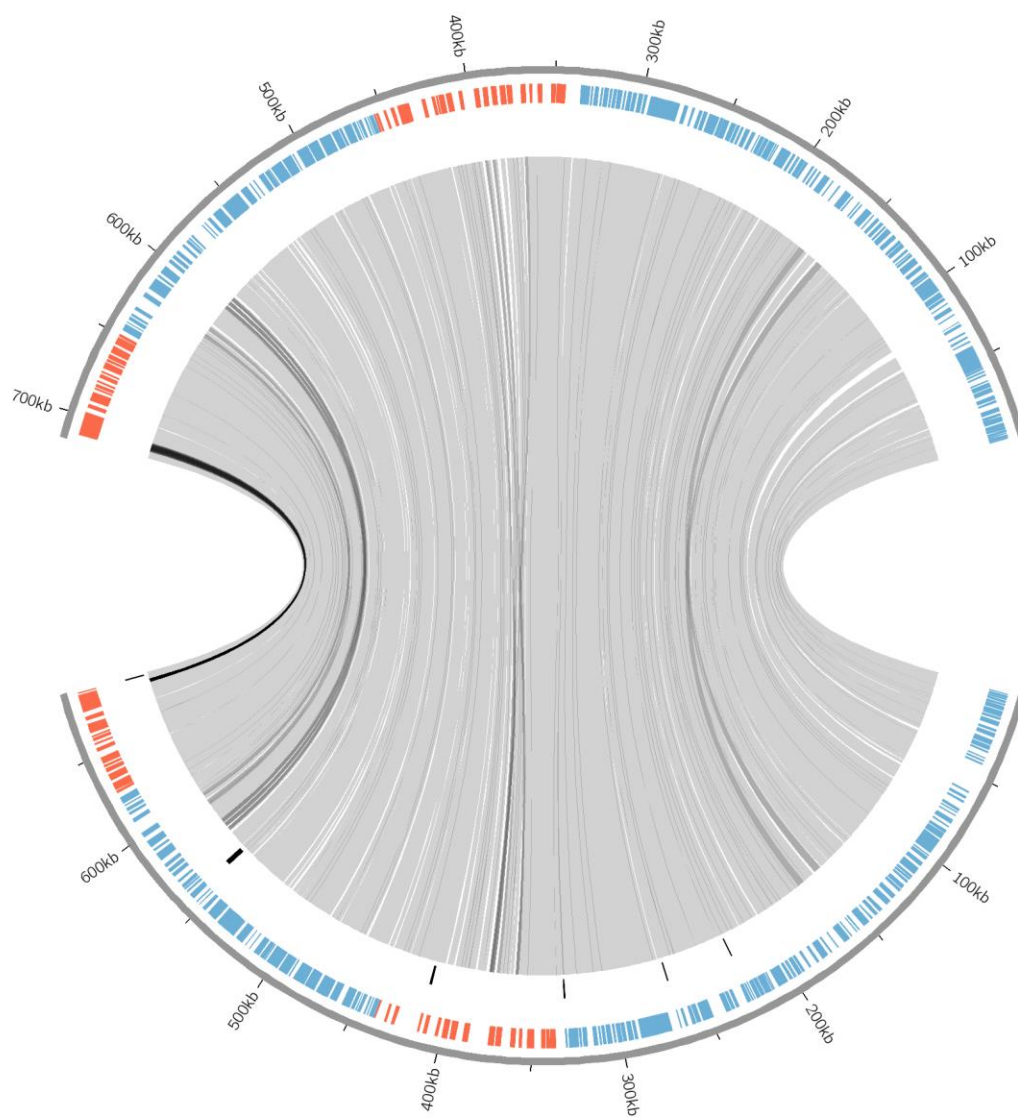

LdCL 16



LmjF.17

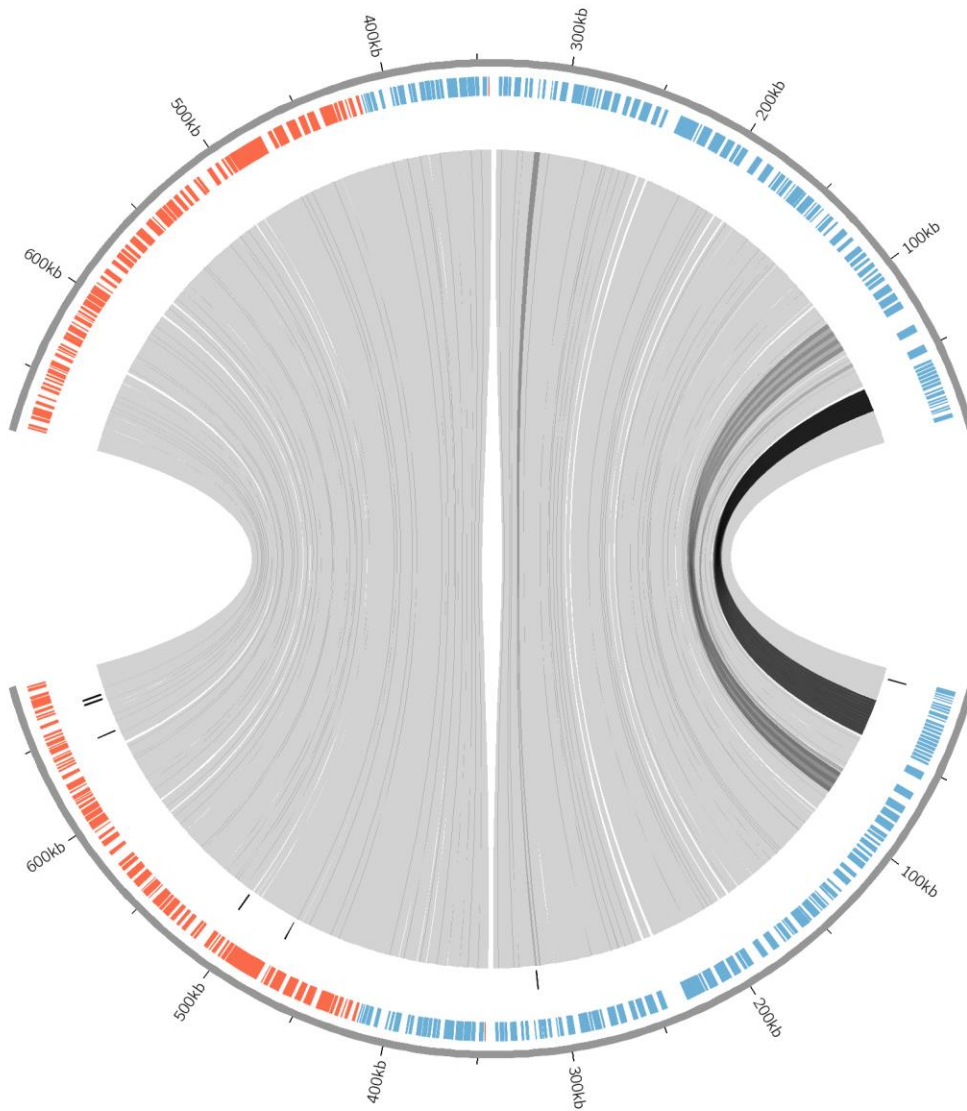

LdCL 17

LmjF.18

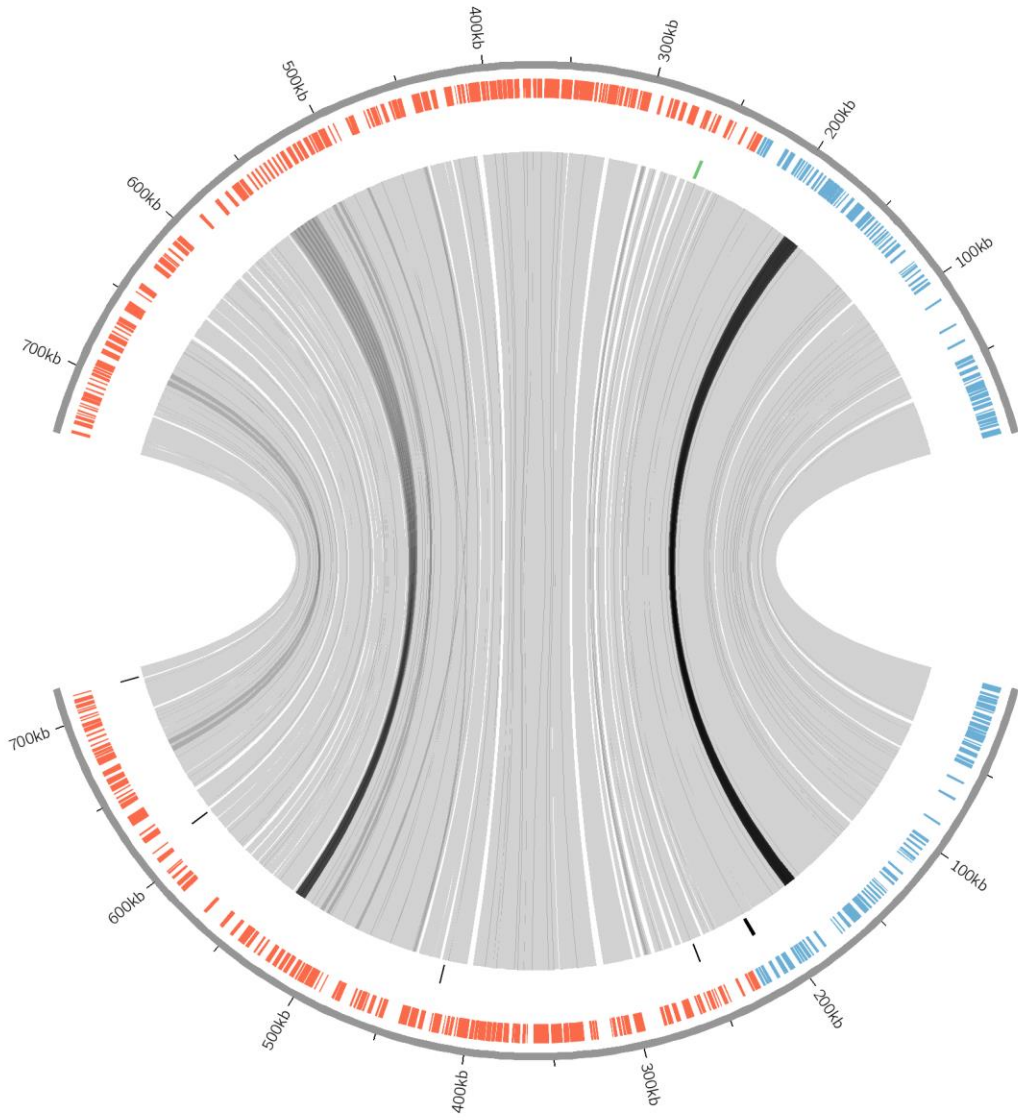

LdCL 18

LmjF.19

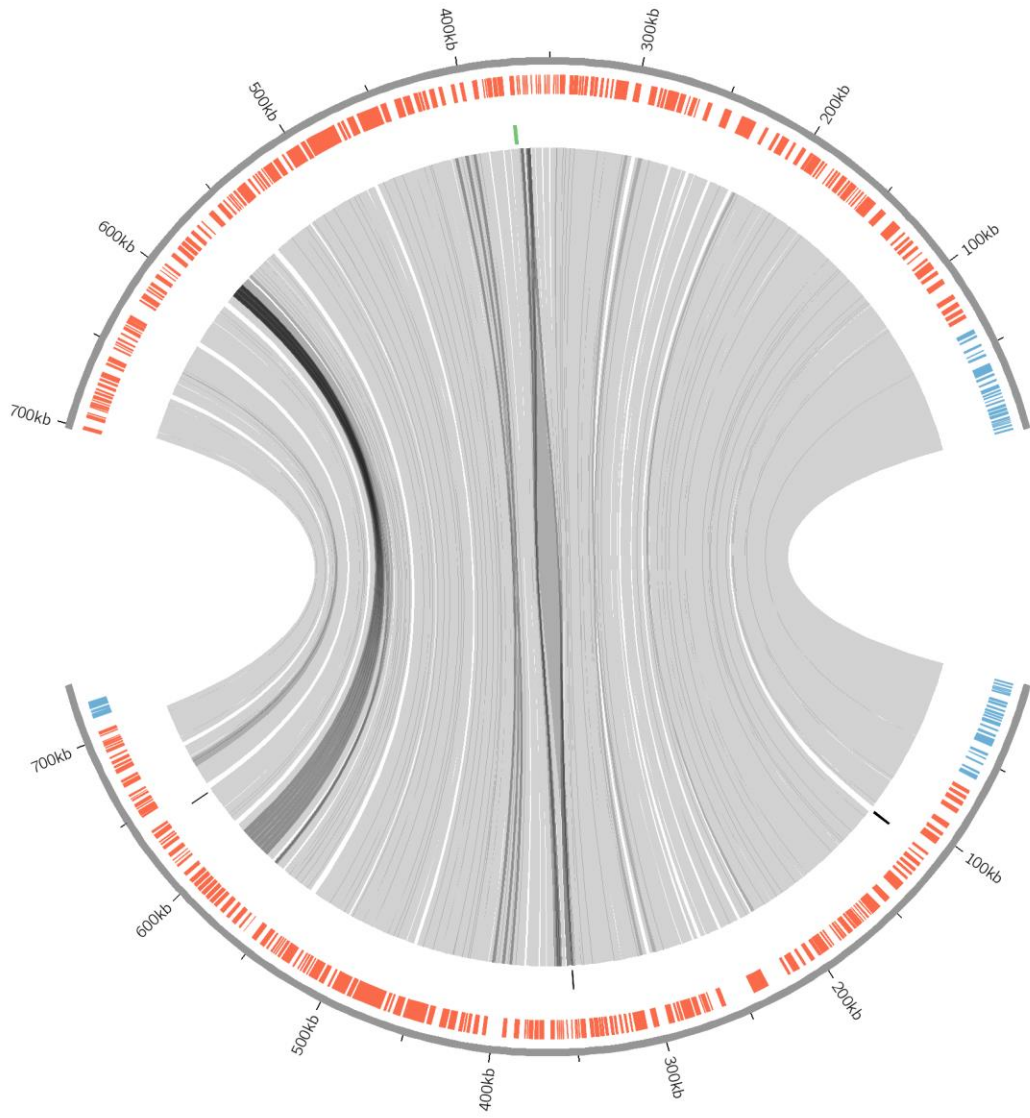

LdCL 19

LmjF.20

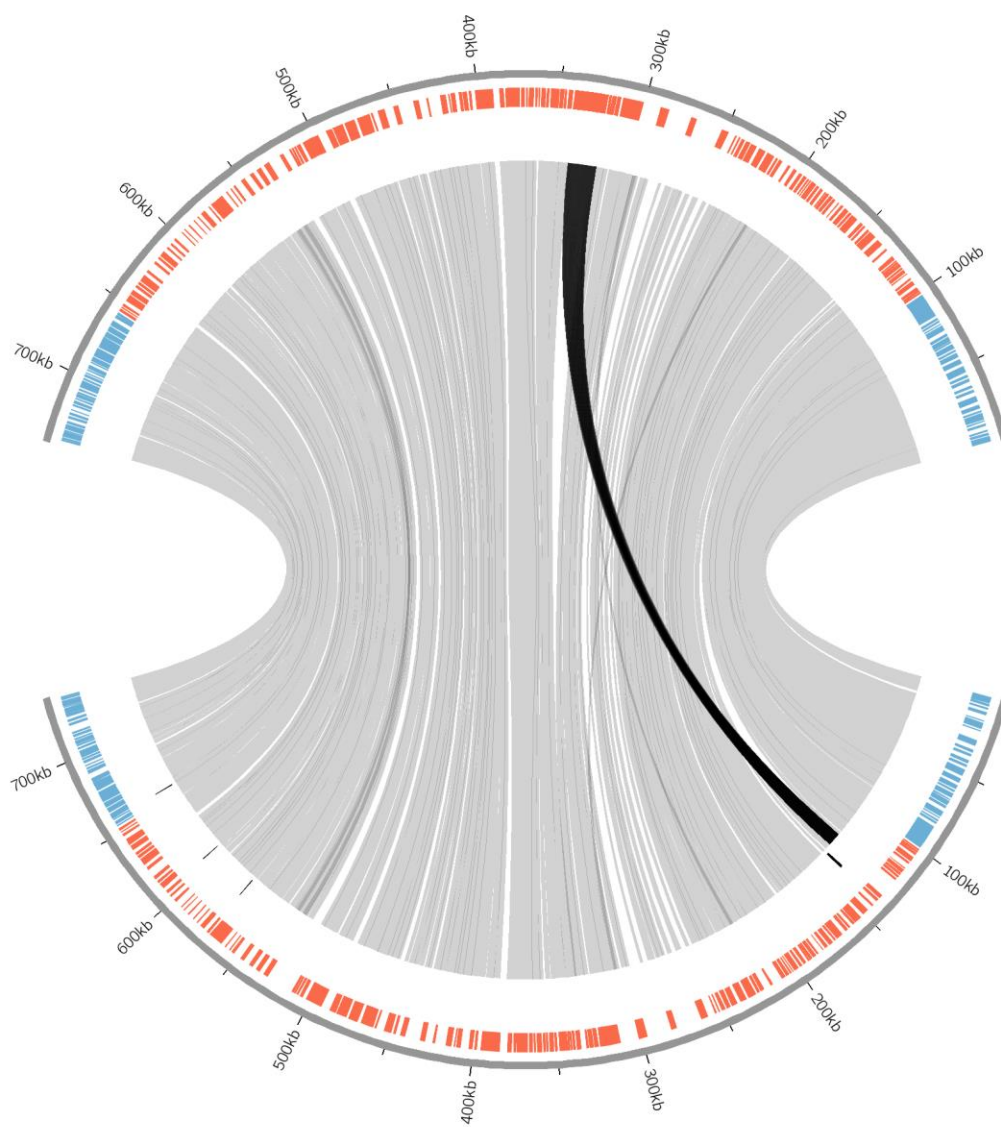

LdCL 20

LmjF.21

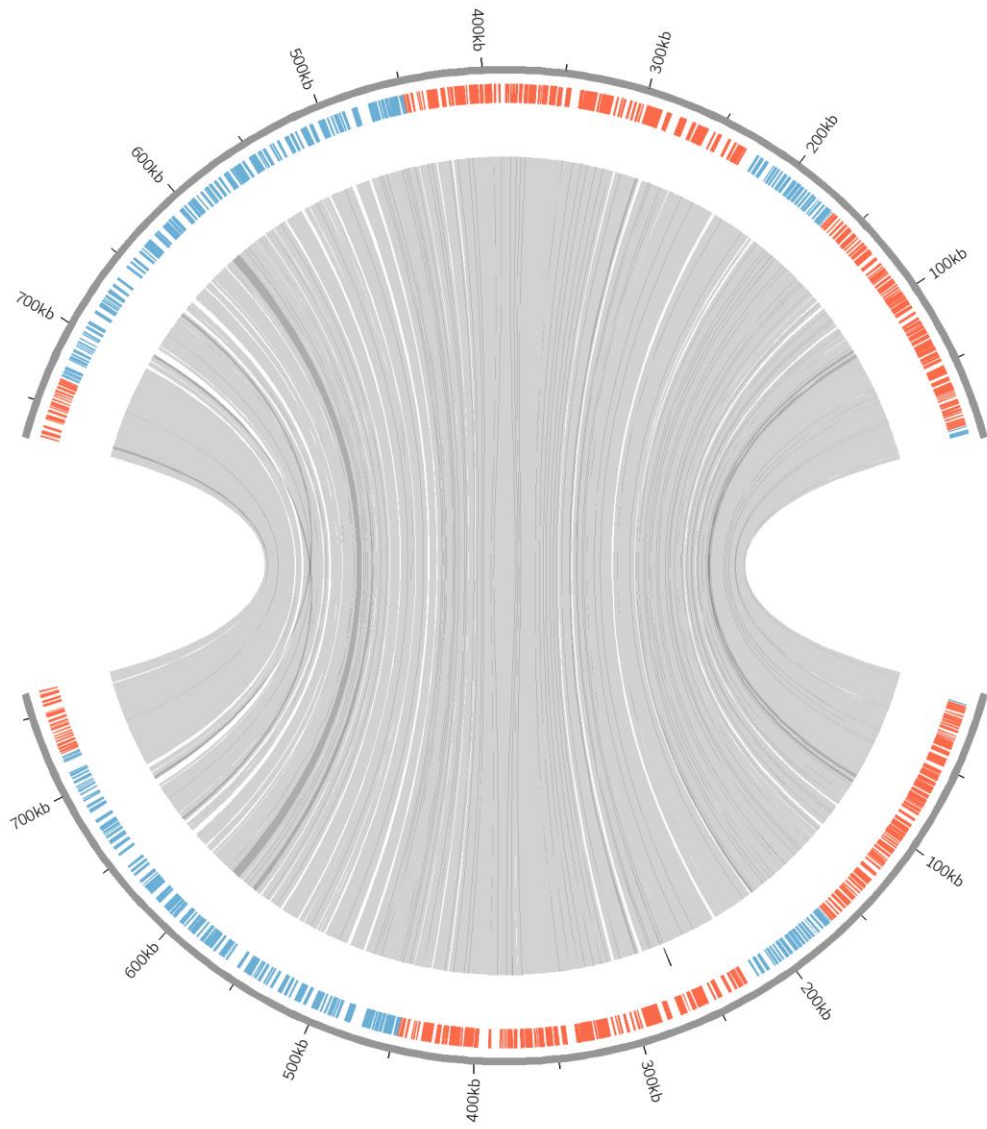

LdCL 21

LmjF.22

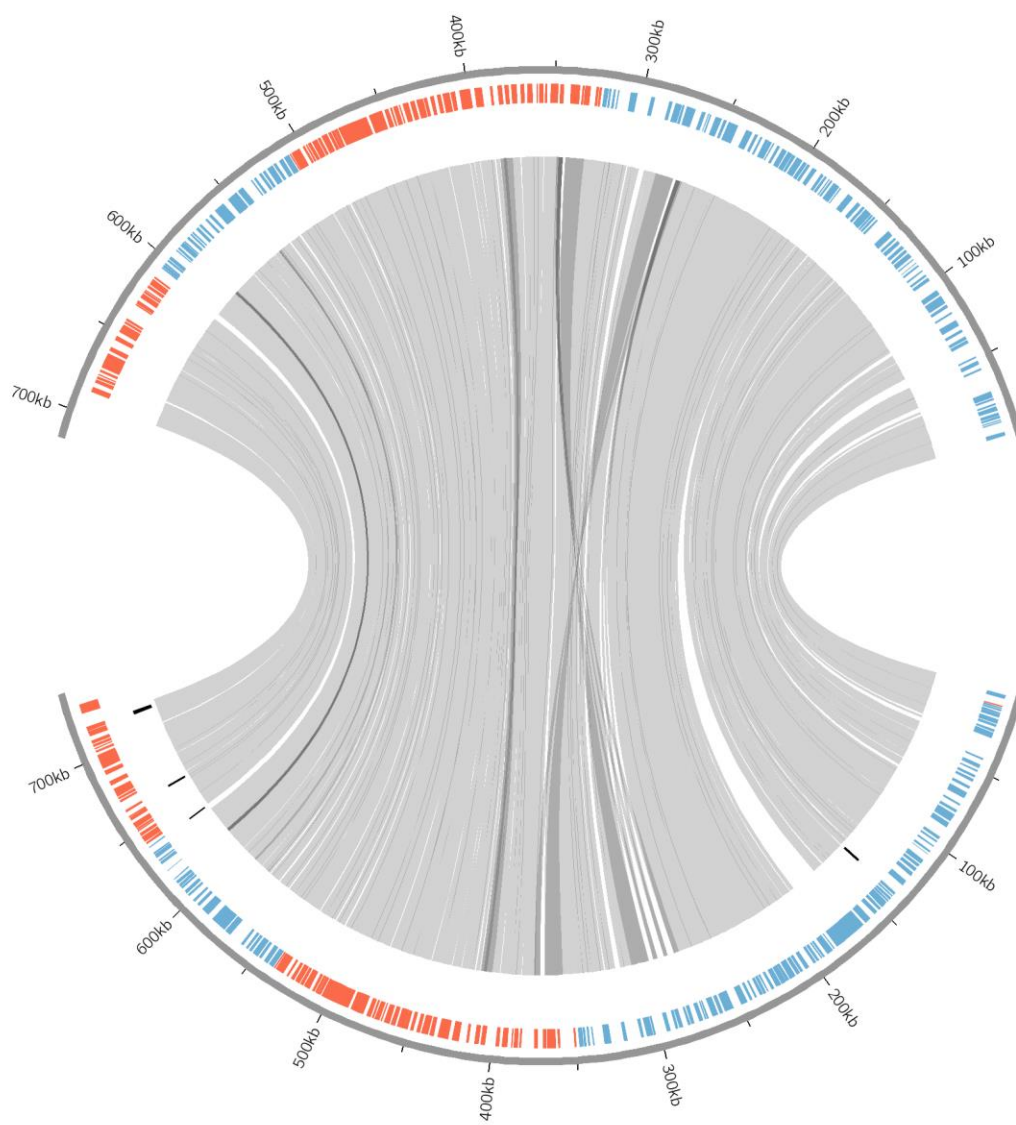

LdCL 22

LmjF.23

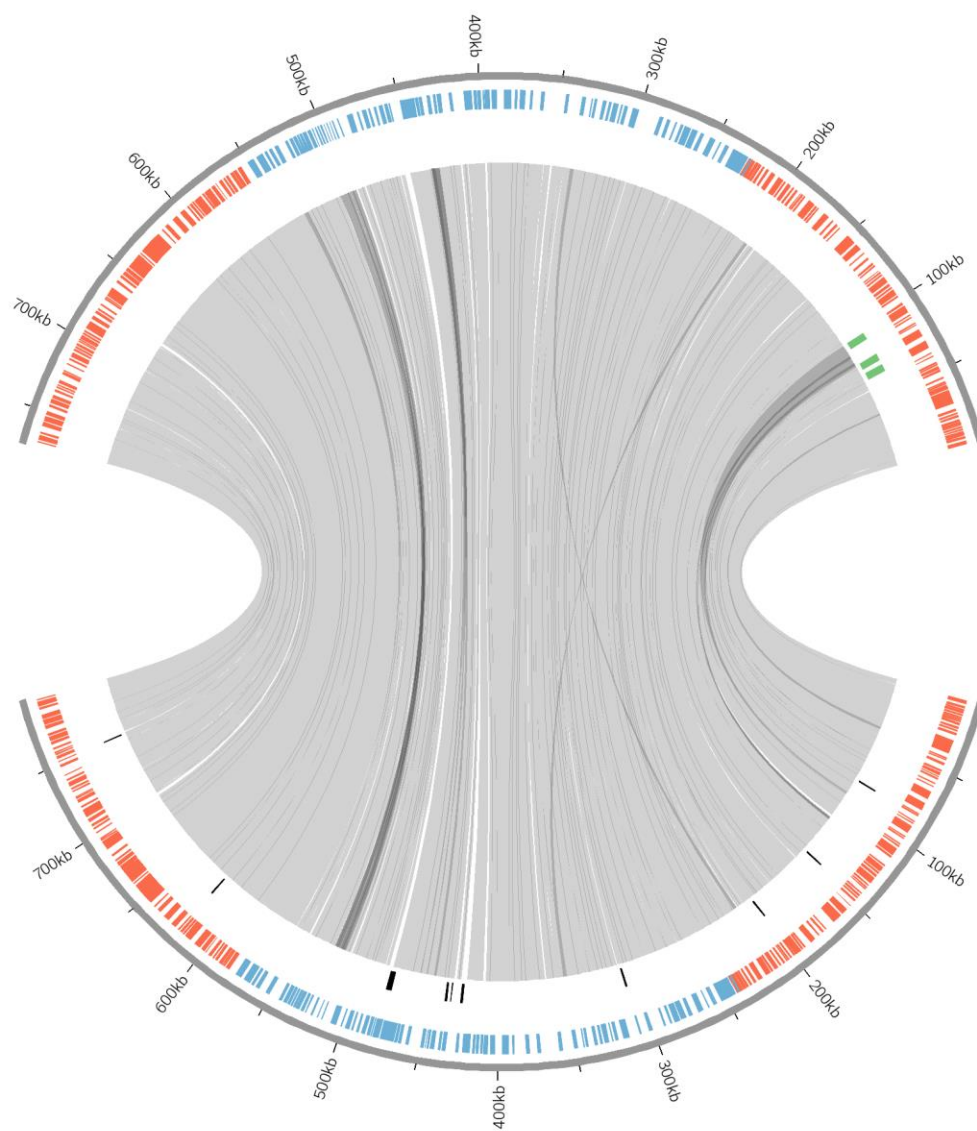

LdCL 23

LmjF.24

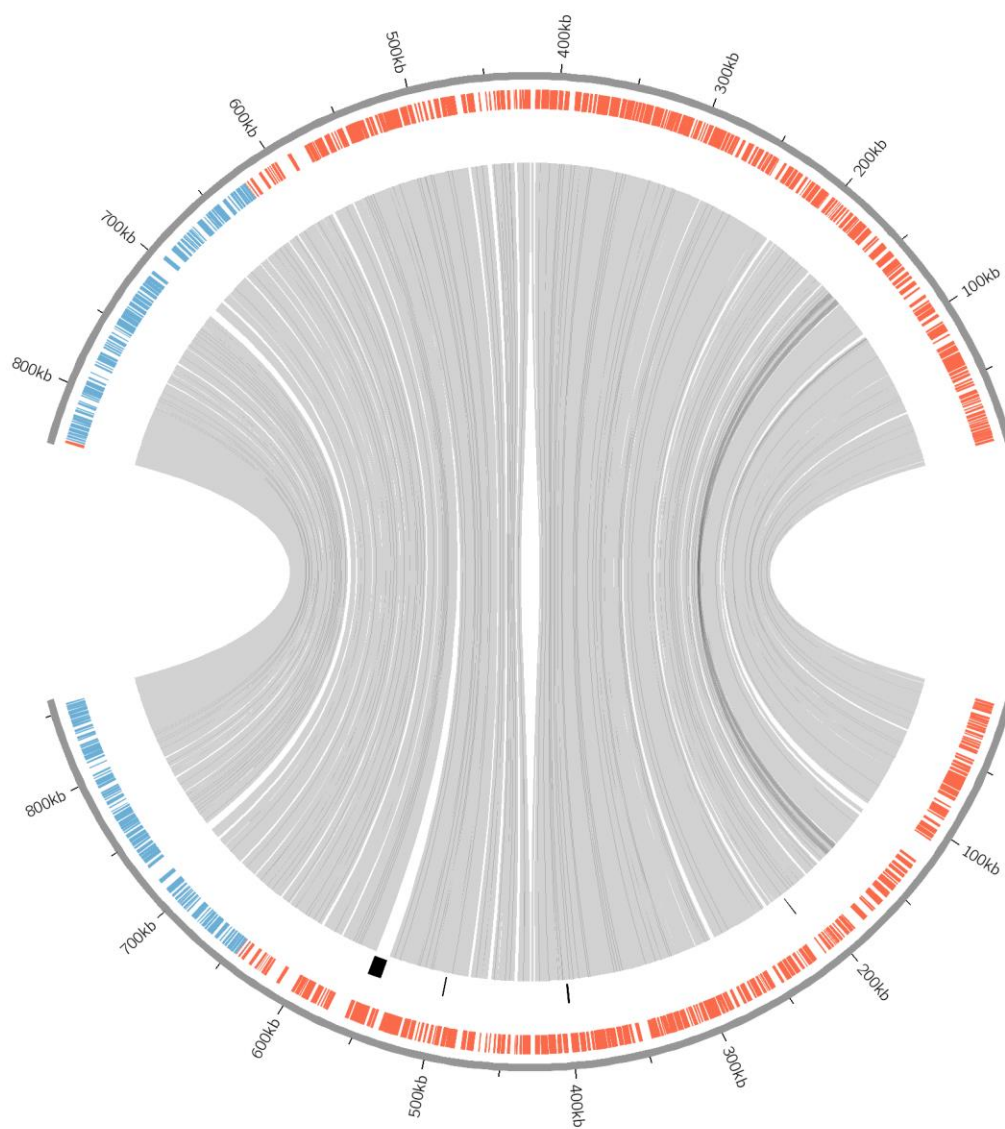

LdCL 24



LmjF.25

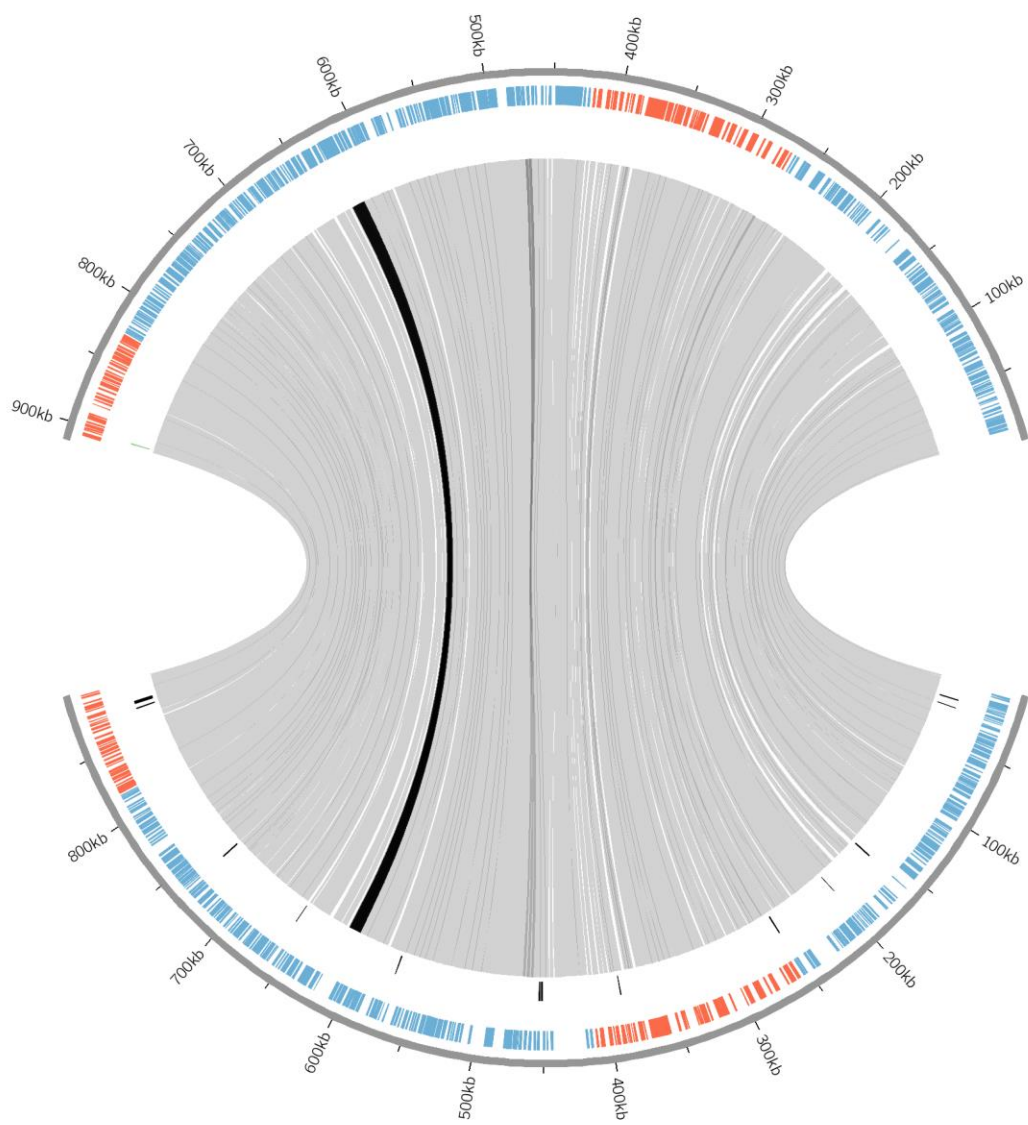

LdCL 25

LmjF.26

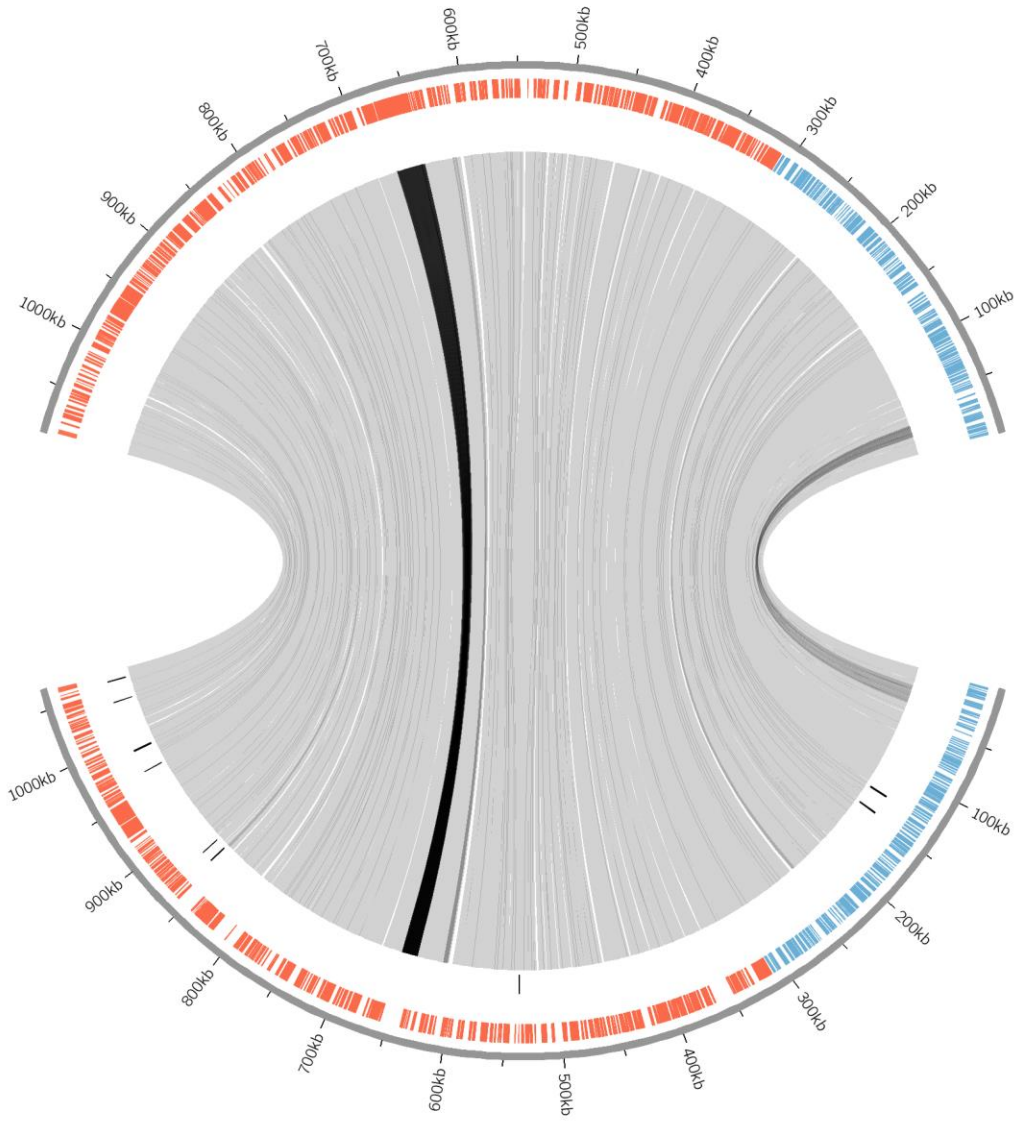

LdCL 26

LmjF.27

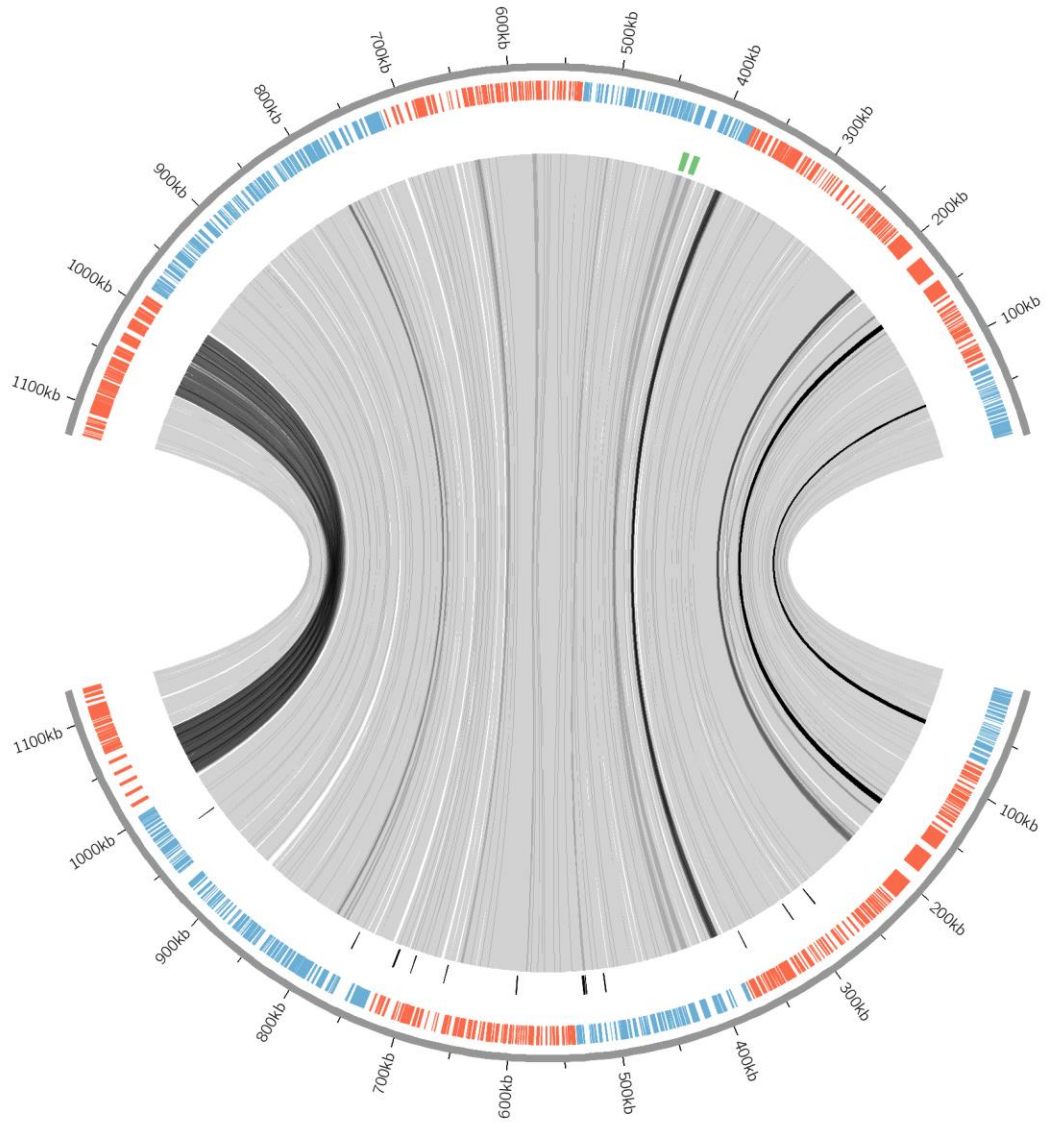

LdCL 27

LmjF.28

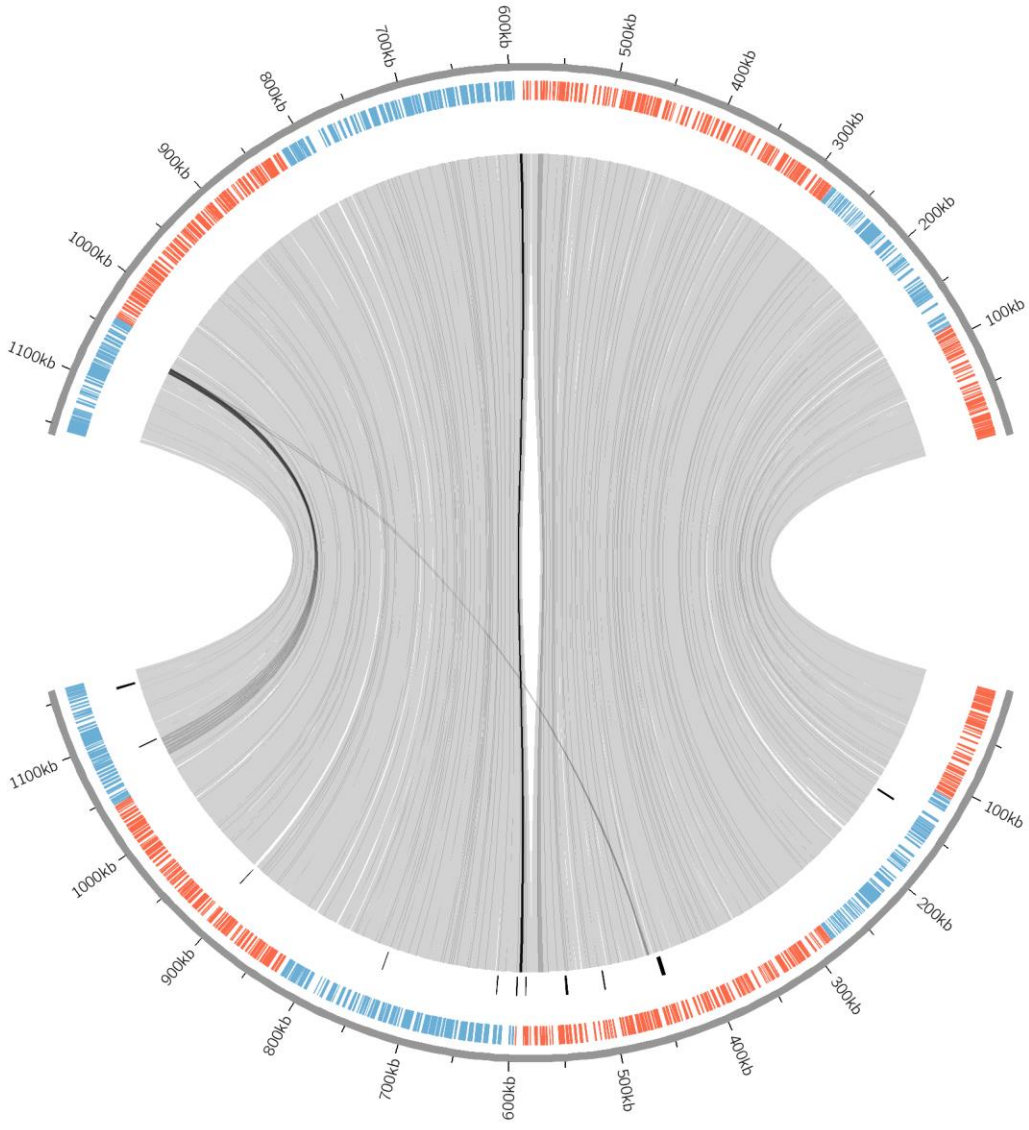

LdCL 28

LmjF.29

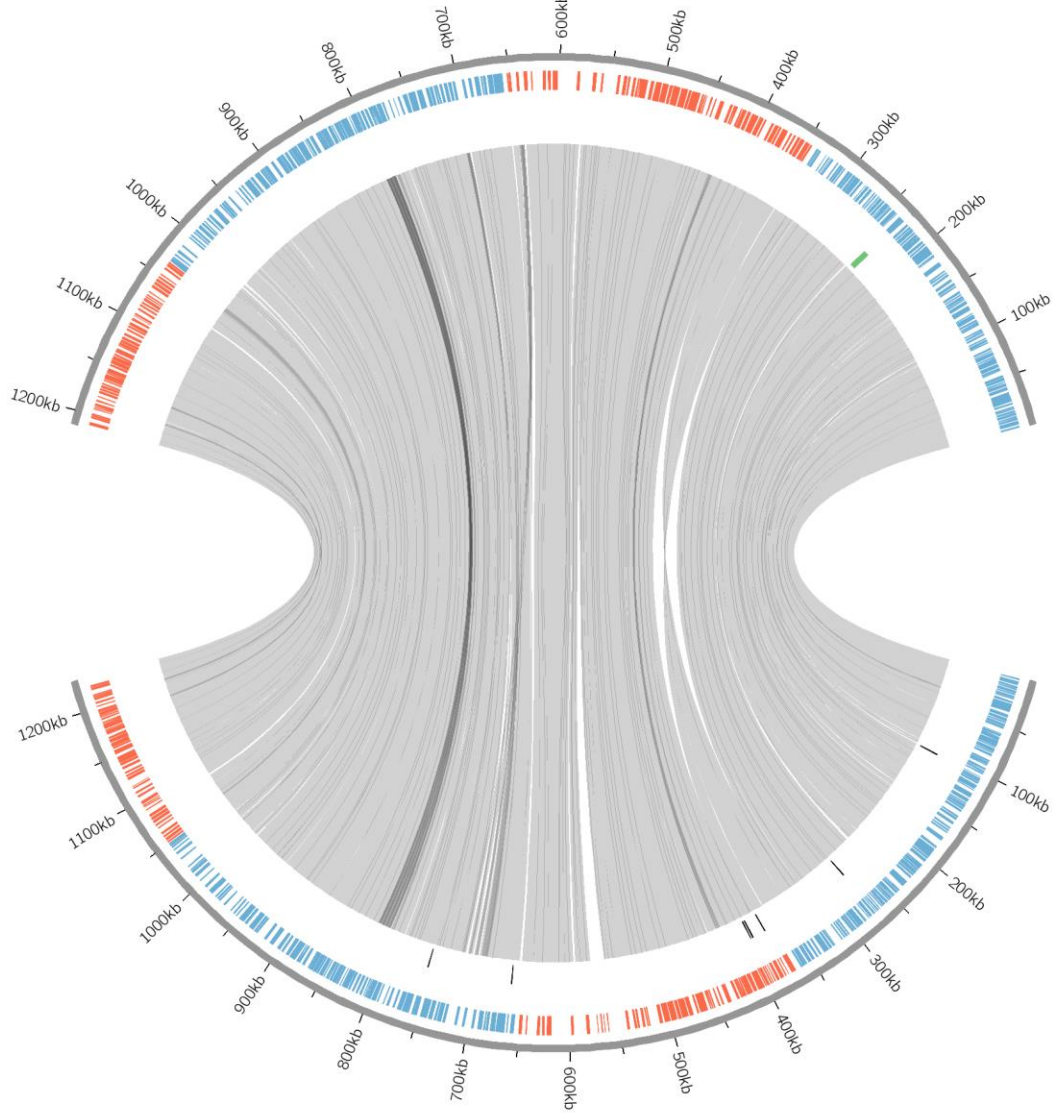

LdCL 29

LmjF.30

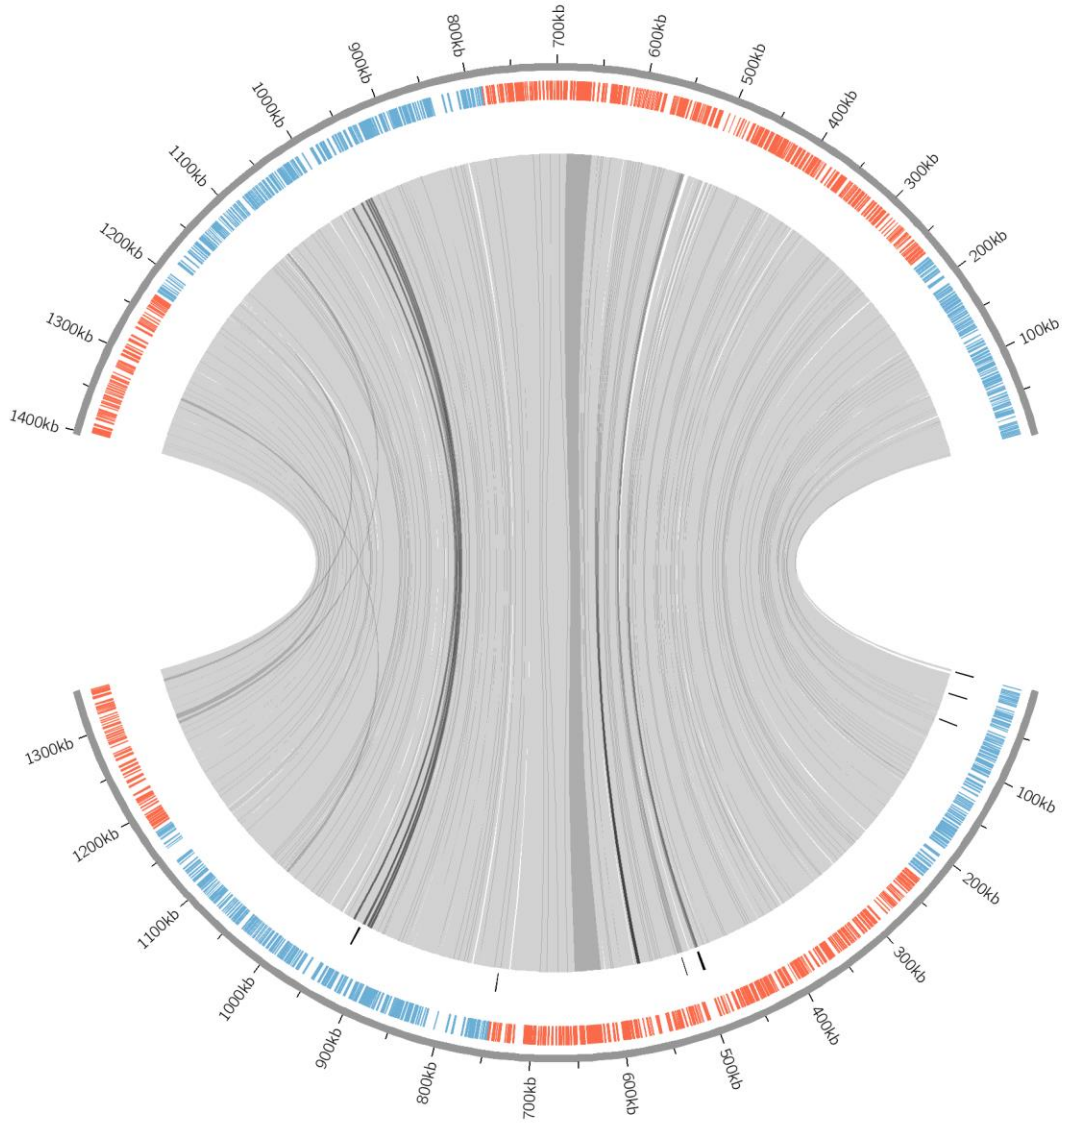

LdCL 30

LmjF.31

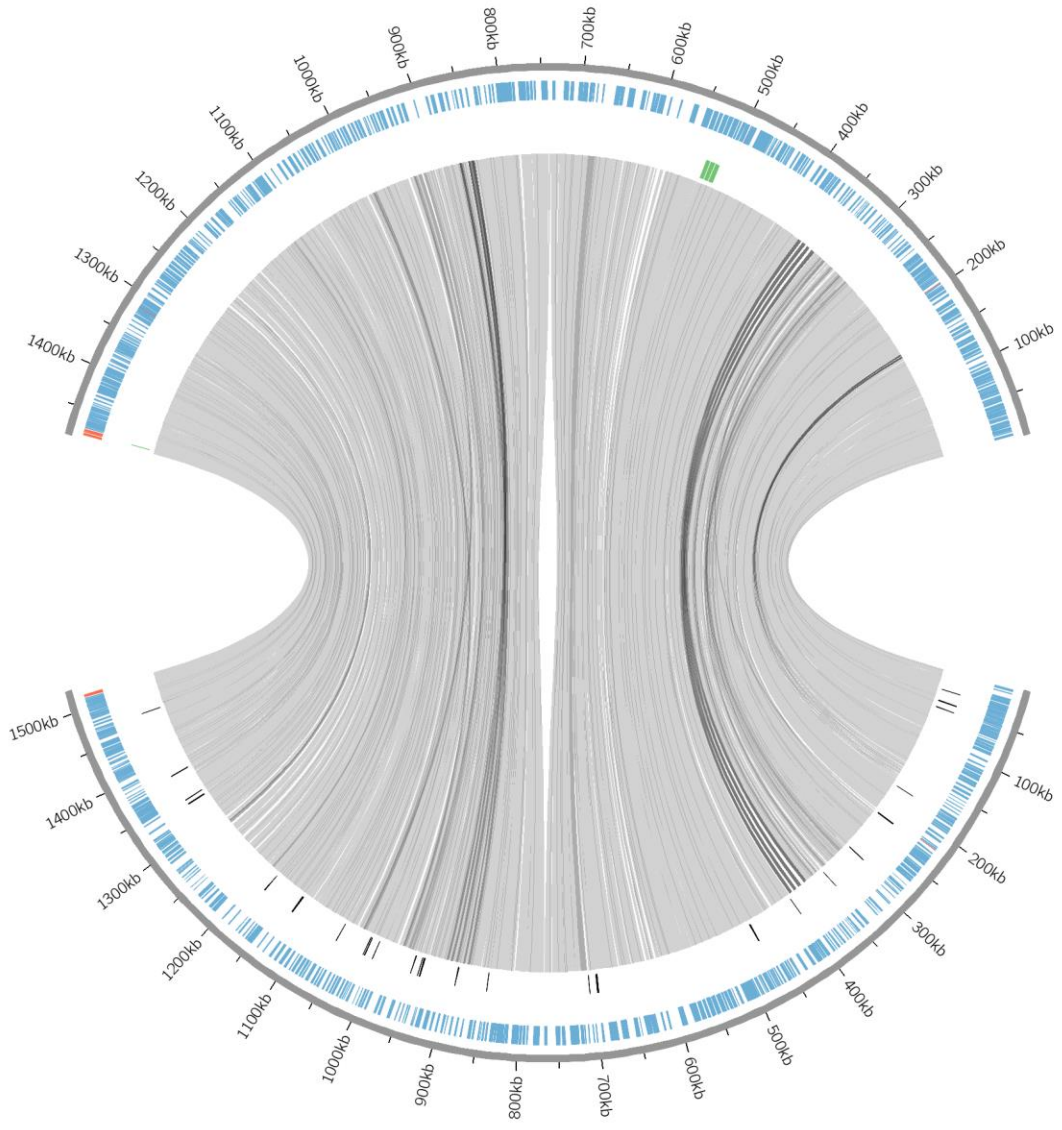

LdCL 31

LmjF.32

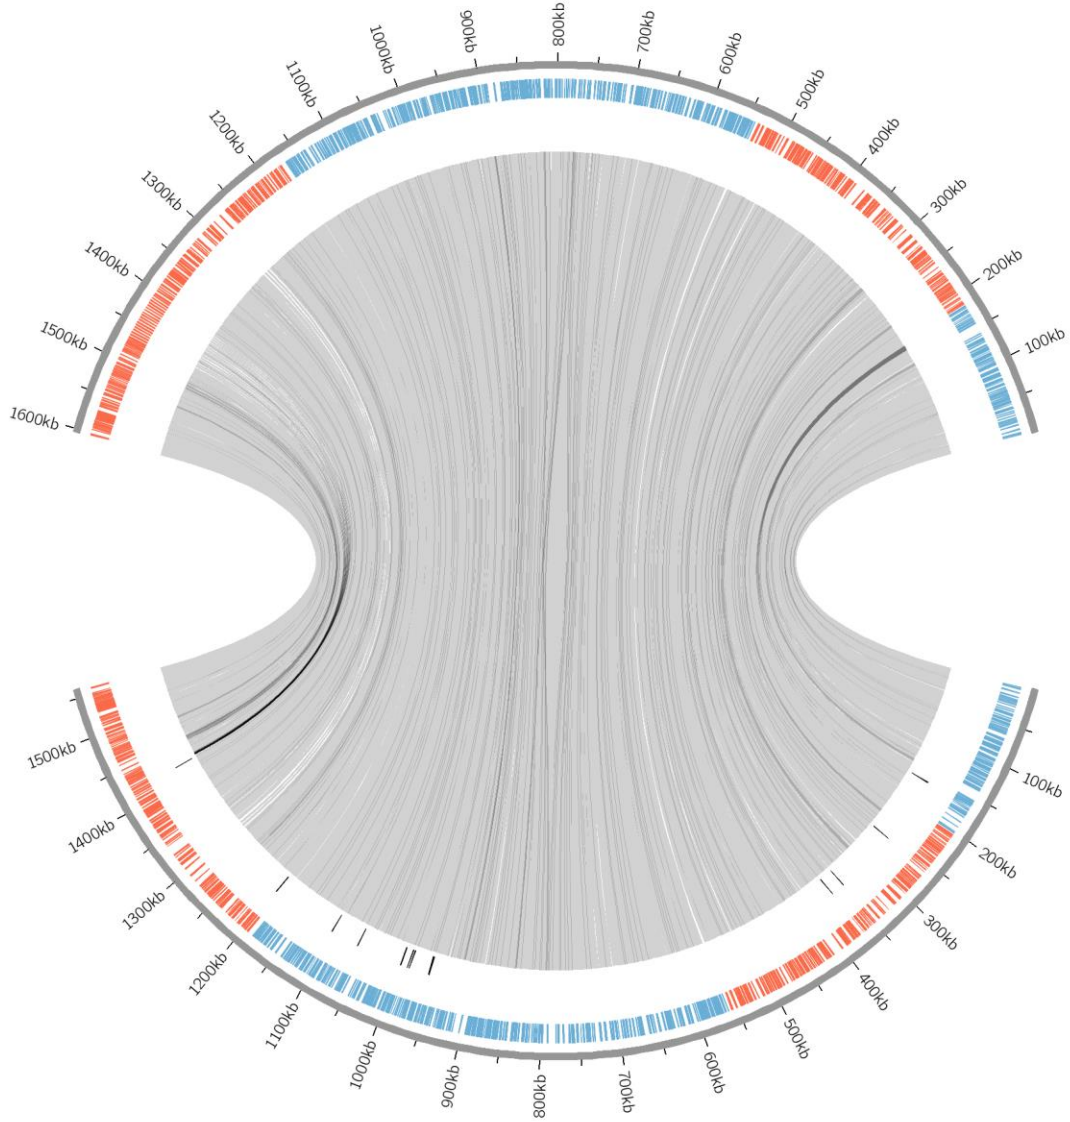

LdCL 32



LmjF.33

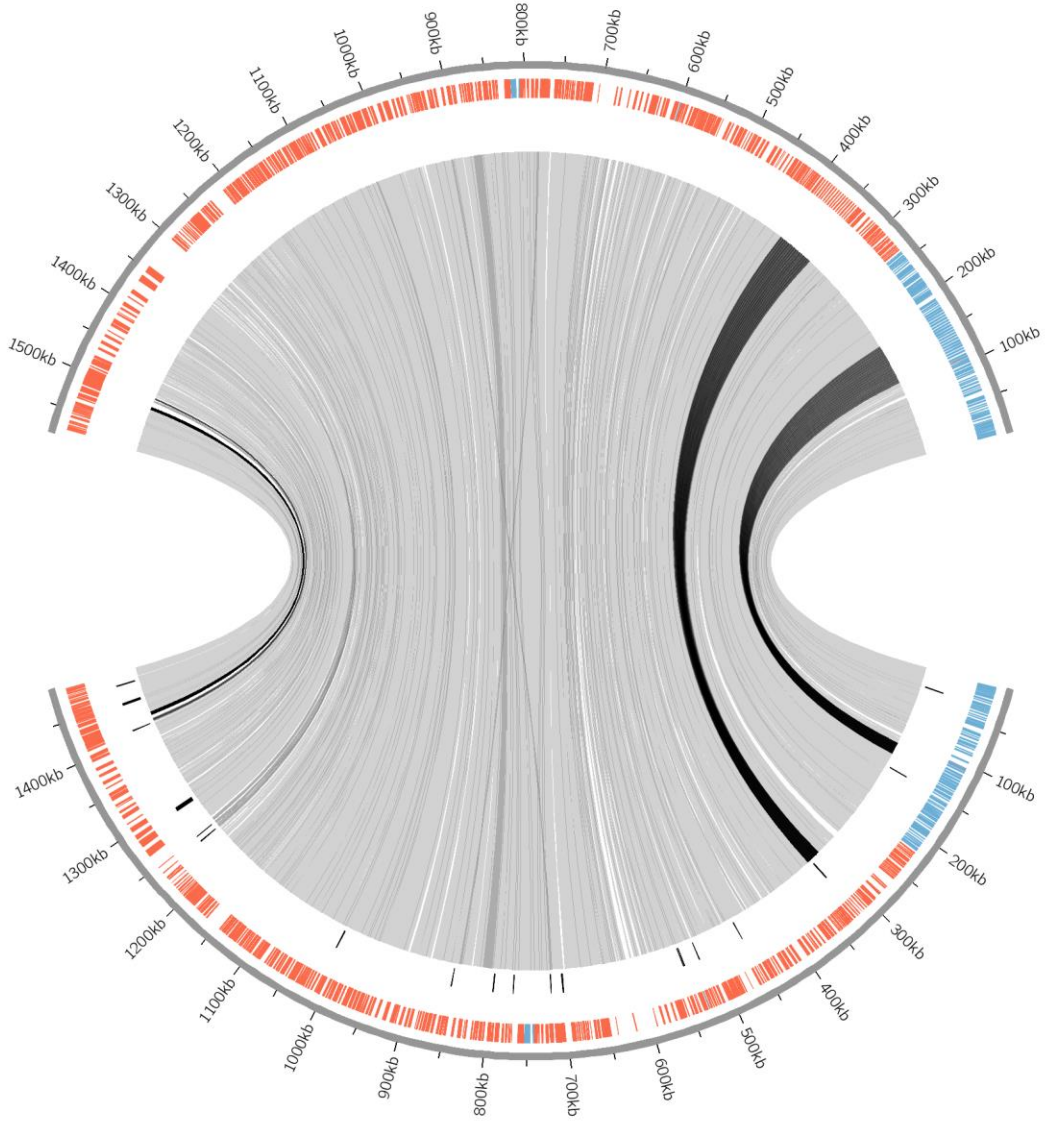

LdCL 33

LmjF.34

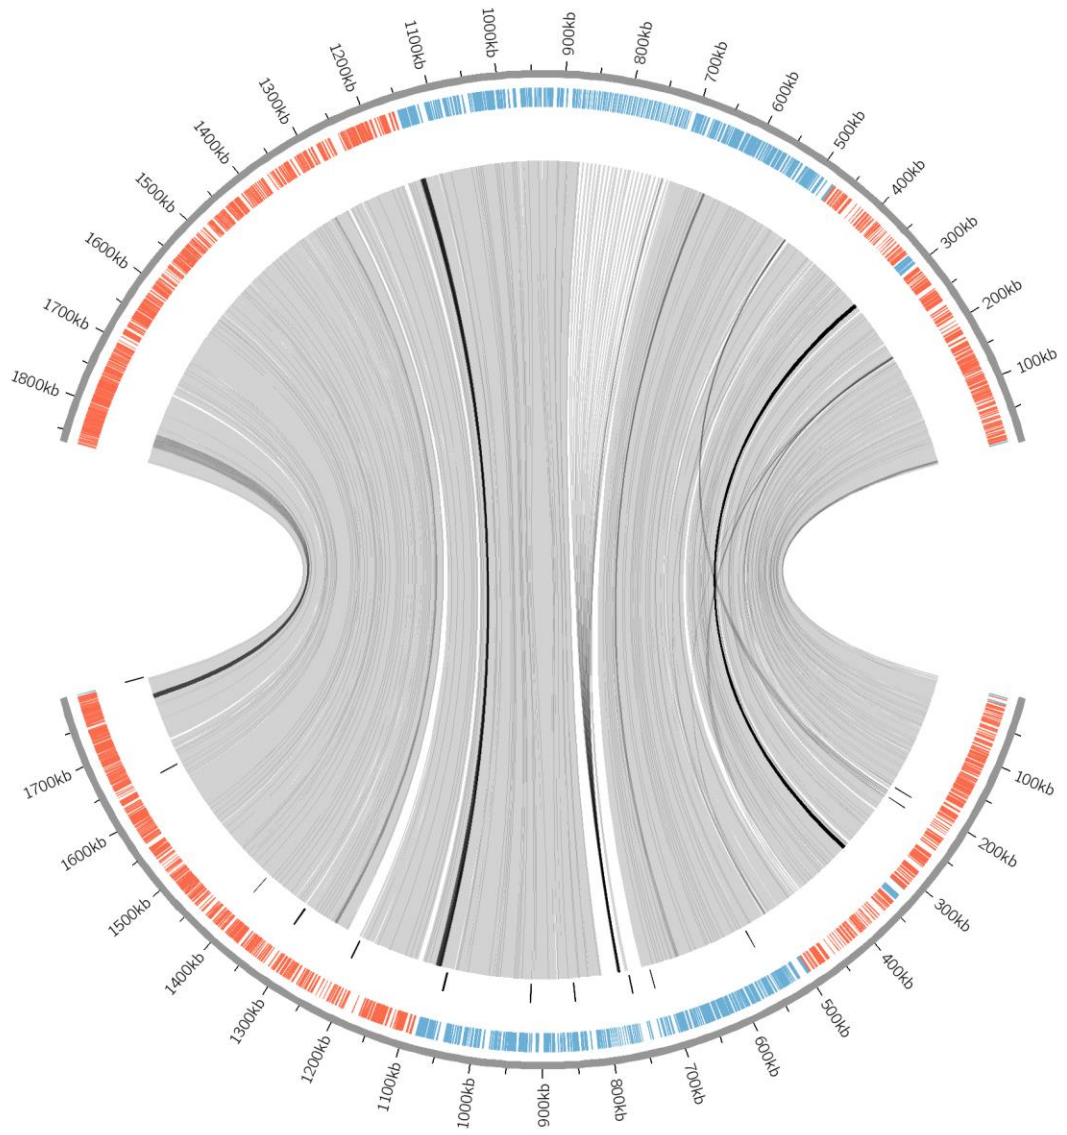

LdCL 34

LmjF.35

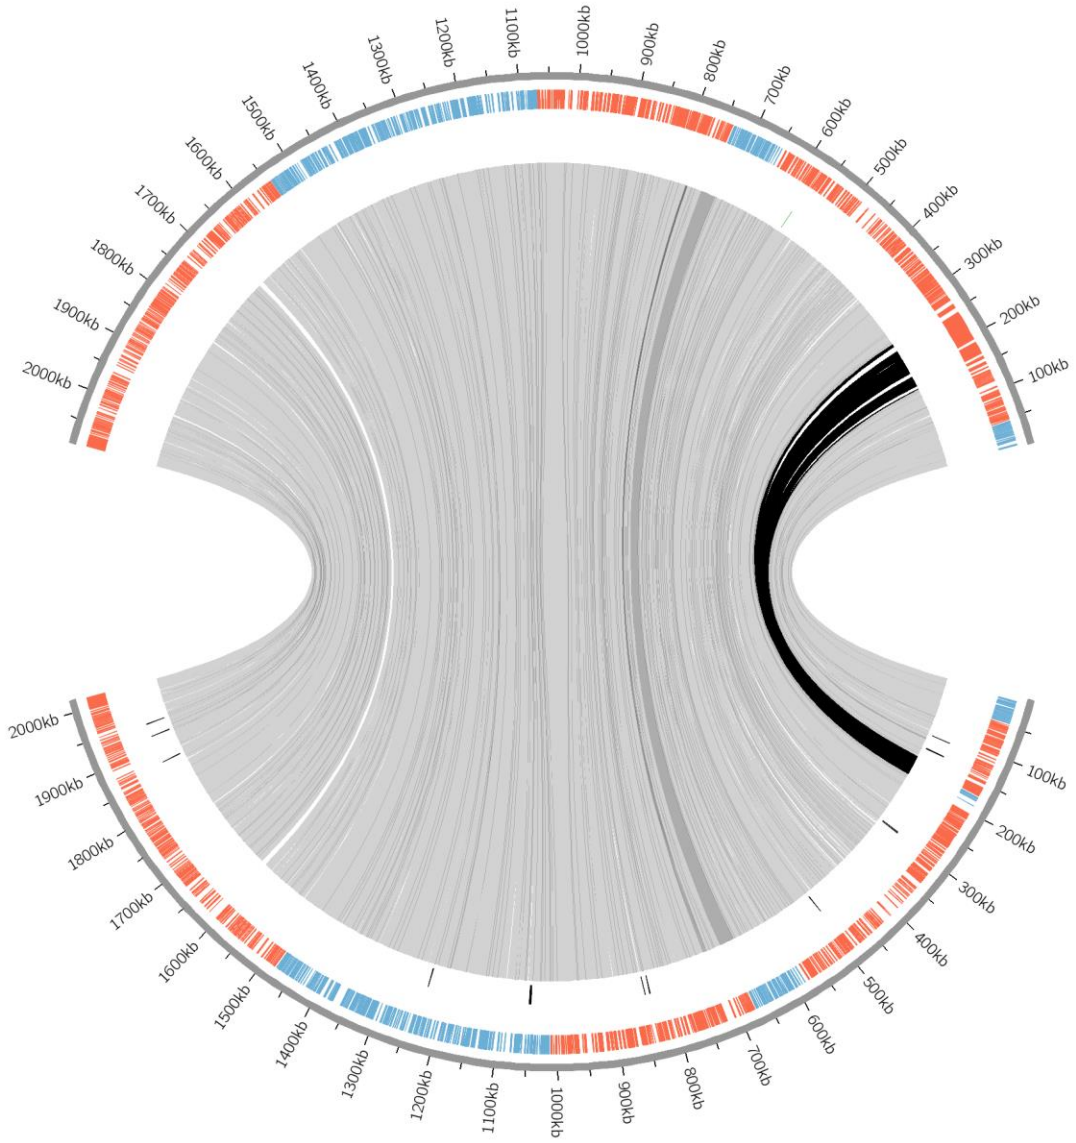

LdCL 35

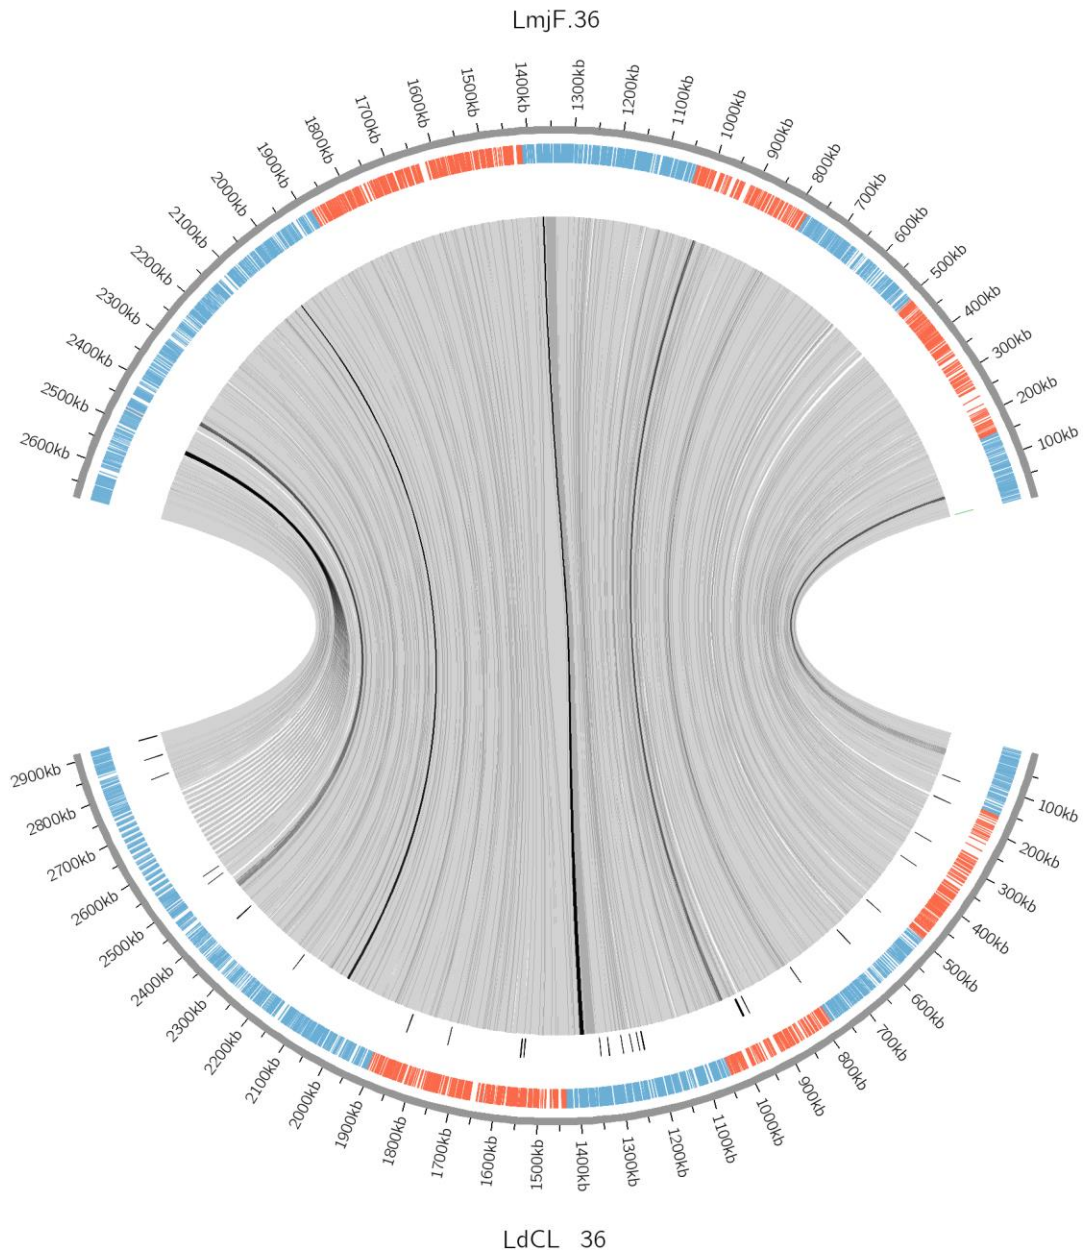

Annotations from both species were aligned to their respective genome and compared to each other. Each chromosome is represented as a half circle. ORFs are colored according to their coding strands. Black lines represent pairs of homologous genes between *L. major* (top) and attenuated cutaneous *L. donovani* (bottom).

**Supplementary Figure S4.** Confirmation of a 25kb deletion on chromosome 36

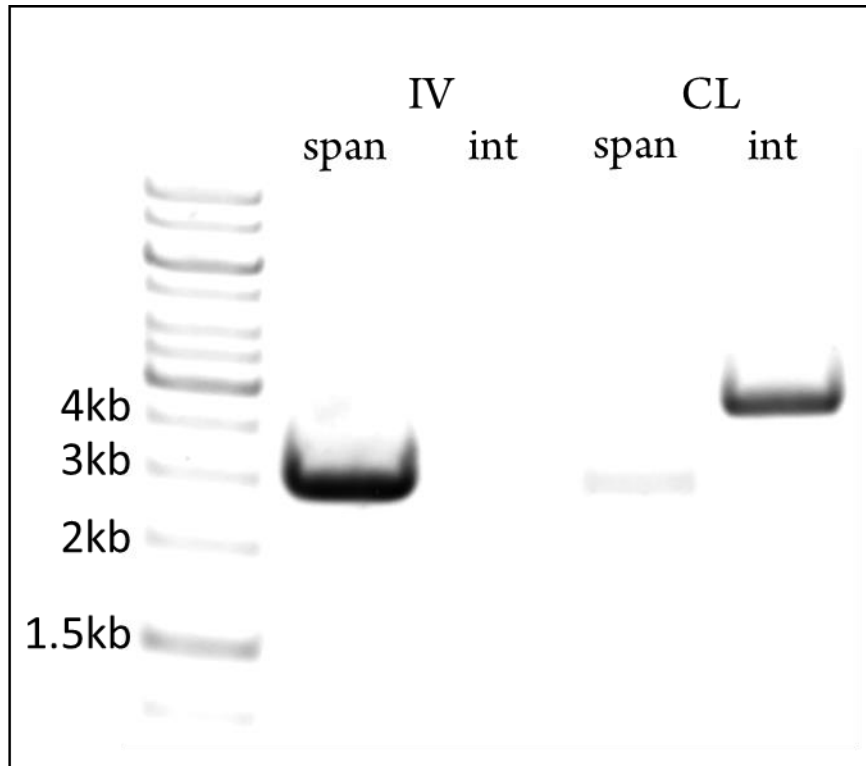

Primers were designed to amplify a fragment spanning across the deletion (span) and to amplify a region internal to the deletion (int). The IV strain only produced an amplicon from either end of the deletion indicating the 28kb region collapsed to 3kb but was unable to produce any amplicon internal to the deleted region, indicating the 25kb region was absent rather than translocated. The CL strain mainly produced the internal region as the entire 28kb fragment is too long to be efficiently resolved by PCR and a faint band also appeared in the span reaction indicating the presence of some cells within the population that also contained the deletion.

## Supplementary methods S1

Relaxed.spec:

merSize=14

asmOvlErrorRate=0.10

asmUtgErrorRate=0.10

asmCnsErrorRate=0.10

asmCgwErrorRate=0.10

asmOBT=1

asmObtErrorRate=0.08

asmObtErrorLimit=4.5

utgGraphErrorRate=0.05

utgMergeErrorRate=0.05

ovlHashBits=26

ovlHashLoad=0.80

sensitive = 1

maxCoverage=60

gridOptionsOverlap = -pe threads 16 -l mem=2GB

gridOptionsConsensus = -pe threads 16

gridOptionsScript = -pe threads 5

merylThreads = 60

ovlThreads = 60

merylMemory = 12000

ovlStoreMemory = 12000

ovlConcurrency = 1

mbtThreads=60

merOverlapperThreads=60

frgCorrThreads=60

batThreads=60
